# Supplementary material for: Ferroelectric columnar assemblies from the bowl-to-bowl inversion of aromatic cores
Source: PubMed Central journal article supplement (PMC7859410; doi:10.1038/s41467-021-21019-4), 2021-02-03

# Supplementary Information for Ferroelectric Columnar Assemblies Arising from Bowl-to-Bowl Invertible Aromatic Cores

Shunsuke Furukawa,\* Jianyun Wu, Masaya Koyama, Keisuke Hayashi, Norihisa Hoshino, Takashi Takeda, Yasutaka Suzuki, Jun Kawamata, Masaichi Saito,\* Tomoyuki Akutagawa,\*

## Table of contents

|                                                                                                    |     |
|----------------------------------------------------------------------------------------------------|-----|
| 1. General consideration for the synthesis and characterization .....                              | S2  |
| 2. Synthetic procedures for all compounds .....                                                    | S3  |
| 3. The optimized structures of triselenasumanene .....                                             | S6  |
| 4. PXRD analysis of <b>C<sub>n</sub>SS</b> derivatives.....                                        | S7  |
| 5. POM images of <b>C<sub>n</sub>SS</b> derivatives.....                                           | S9  |
| 6. SHG measurements of <b>C<sub>n</sub>SS</b> derivatives .....                                    | S11 |
| 7. Dielectric properties of <b>C<sub>n</sub>SS</b> derivatives .....                               | S12 |
| 8. Properties of the reference compounds, <b>C<sub>4</sub>SeS</b> and <b>C<sub>6</sub>TP</b> ..... | S15 |
| 9. Theoretical calculations of motional freedom .....                                              | S17 |
| 10. NMR charts .....                                                                               | S19 |

## 1. General consideration for the synthesis and characterization

NMR spectra were recorded on a Bruker AVANCE500 spectrometer ( $^1\text{H}$  NMR, 500 MHz;  $^{13}\text{C}$  NMR, 126 MHz) and a Bruker AVANCE400 spectrometer ( $^1\text{H}$  NMR, 400 MHz;  $^{13}\text{C}$  NMR, 100 MHz). Chemical shifts for  $^1\text{H}$  NMR spectra are reported in parts per million (ppm,  $\delta$  scale) downfield from tetramethylsilane, and referenced internally to the residual proton in the solvent ( $\text{CDCl}_3$ :  $\delta$  7.26). Chemical shifts for  $^{13}\text{C}$  NMR spectra are reported in parts per million (ppm,  $\delta$  scale) downfield from tetramethylsilane, and are referenced to the  $^{13}\text{C}$  resonance of the NMR solvent ( $\text{CDCl}_3$ :  $\delta$  77.00). The data are presented as follows: chemical shift, multiplicity (t = triplet, q = quartet, quint = quintet, m = multiplet and/or multiple resonances), coupling constant in hertz (Hz), and integration. Mass spectra were obtained with a Bruker AutoflexIII (MALDI-TOF) mass spectrometer. Melting points were measured by Yanaco MP-S3 instrument. Column chromatography was performed using Kanto silica gel 60N. Thin layer chromatography was performed using Merck Silica Gel 60 F254, TLC Plates.

## 2. Synthetic procedures for all compounds

### Synthesis of C2SS

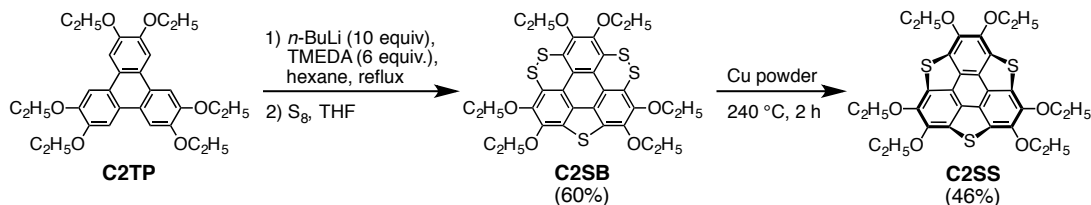

*N,N,N',N'*-Tetramethylethylenediamine (14.5 mL, 97.3 mmol) was added to a suspension of 2,3,6,7,10,11-hexaethoxytriphenylene (**C2TP**) (8.02 g, 16.3 mmol) in hexane (380 mL). *n*-BuLi in hexane (2.66 M, 62 mL, 165 mmol) was added dropwise to the suspension for 5 min at room temperature, then the mixture was refluxed for 3.5 hours. After cooling to room temperature, volatiles were removed under reduced pressure. THF (300 mL) was added to the resulting solid and then cooled below  $-60$  °C. To the mixture, sulfur powder (8.36 g, 261 mmol) was added in one portion and the mixture was stirred for 30 min at the same temperature. Then the mixture was allowed to warm to room temperature and stirred for 7 hours. After stirring, aqueous NH<sub>4</sub>Cl was added to the mixture, and the reaction mixture was extracted with dichloromethane. The extract was dried over anhydrous magnesium sulfate and concentrated under reduced pressure to give a crude product. The products were purified by silica gel column chromatography (hexane/chloroform) to give thienotriphenylenobis(dithiin) **C2SB** (6.31 g, 9.75 mmol, 60%) as a yellow solid.

Copper powder (11.9 g, 187 mmol) was added to **C2SB** (4.04 g, 6.24 mmol), then the mixture was stirred at 240 °C for 2 hours. After cooling to room temperature, dichloromethane was added to the reaction mixture. Insoluble solids were removed by filtration, then volatiles were removed under reduced pressure to obtain crude products. The products were purified by silica gel column chromatography (hexane/dichloromethane) to give **C2SS** (1.69 g, 2.90 mmol, 46%) as a pale yellow solid. Unreacted starting material **2** (1.57 g, 2.43 mmol, 39%) was also recovered.

### Compounds data

**C2SB**: yellow solid, mp. 148–150 °C; <sup>1</sup>H NMR (400 MHz, CDCl<sub>3</sub>) δ 1.48–1.53 (m, 18 H), 4.32 (q, *J* = 6.8 Hz, 8H), 4.48 (q, *J* = 6.8 Hz, 4H); <sup>13</sup>C NMR (100 MHz, CDCl<sub>3</sub>) δ 15.90 (CH<sub>3</sub>), 15.92 (CH<sub>3</sub>), 16.10 (CH<sub>3</sub>), 69.19 (CH<sub>2</sub>), 70.32 (CH<sub>2</sub>), 70.62 (CH<sub>2</sub>), 122.10 (C), 122.48 (C), 124.32 (C), 126.30 (C), 128.49 (C), 129.05 (C), 146.59 (C), 147.07 (C), 148.66 (C); MS (MALDI) *m/z* calcd for C<sub>30</sub>H<sub>30</sub>O<sub>6</sub>S<sub>5</sub> (M<sup>+</sup>) 646.1, found: 646.0; elemental analysis calcd for C<sub>30</sub>H<sub>30</sub>O<sub>6</sub>S<sub>5</sub>: C, 55.70; H, 4.67, found: C, 55.79; H, 4.49.

**C2SS**: pale yellow solid, 204–205 °C; <sup>1</sup>H NMR (400 MHz, CDCl<sub>3</sub>) δ 1.55 (t, *J* = 6.8 Hz, 18 H), 4.48

(q,  $J = 6.8$  Hz, 12H);  $^{13}\text{C}$  NMR (100 MHz,  $\text{CDCl}_3$ )  $\delta$  15.99 ( $\text{CH}_3$ ), 69.16 ( $\text{CH}_2$ ), 129.97 (C), 130.81 (C), 146.40 (C); MS (MALDI)  $m/z$  calcd for  $\text{C}_{30}\text{H}_{30}\text{O}_6\text{S}_3$  ( $\text{M}^+$ ) 582.1, found: 582.3; elemental analysis calcd for  $\text{C}_{30}\text{H}_{30}\text{O}_6\text{S}_3$ : C, 61.83; H, 5.19, found: C, 61.72; H, 5.03.

### Synthesis of trithiasumanenes bearing long alkyl chains $\text{C}_n\text{SS}$

$\text{C}_n\text{SS}$  derivatives ( $n = 6, 8, 10,$  and  $16$ ) were synthesized by the following general procedure described in the main text (see Methods section).

#### Synthesis of $\text{C}_6\text{SS}$

For the dealkylation,  $\text{C}_2\text{SS}$  (150 mg, 0.26 mmol) in dichloromethane (5 mL) was treated with boron tribromide in dichloromethane ( $1.0 \text{ mol L}^{-1}$ , 2.6 mL, 2.6 mmol). 1-Bromohexane (0.3 mL, 1.54 mmol), potassium carbonate (305 mg, 2.21 mmol) and DMF (3 mL) were used for the realkylation step.  $\text{C}_6\text{SS}$  (166 mg, 0.18 mmol, 70%) was obtained as a pale yellow solid. mp.  $121^\circ\text{C}$ ,  $^1\text{H}$  NMR (400 MHz;  $\text{CDCl}_3$ )  $\delta$  0.94 (t,  $J = 7.2$  Hz, 18H), 1.41 (br, 24H), 1.58 (quint,  $J = 7.2$  Hz, 12H), 1.90 (quint,  $J = 6.4$  Hz, 12H), 4.40 (t,  $J = 6.4$  Hz, 12H);  $^{13}\text{C}$  NMR (101 MHz;  $\text{CDCl}_3$ )  $\delta$  14.21 ( $\text{CH}_3$ ), 22.81 ( $\text{CH}_2$ ), 25.89 ( $\text{CH}_2$ ), 30.38 ( $\text{CH}_2$ ), 31.81 ( $\text{CH}_2$ ), 73.71 ( $\text{CH}_2$ ), 130.26 (C), 130.97 (C), 146.76 (C); MS (MALDI)  $m/z$  calcd for  $\text{C}_{54}\text{H}_{78}\text{O}_6\text{S}_3$  ( $\text{M}^+$ ) 918.5, found: 919.0; elemental analysis calcd for  $\text{C}_{66}\text{H}_{102}\text{O}_6\text{S}_3$ : C, 70.54; H, 8.55, found: C, 70.14; H, 8.55.

#### Synthesis of $\text{C}_8\text{SS}$

For the dealkylation,  $\text{C}_2\text{SS}$  (150 mg, 0.26 mmol) in dichloromethane (5 mL) was treated with boron tribromide in dichloromethane ( $1.0 \text{ mol L}^{-1}$ , 2.6 mL, 2.6 mmol). 1-Bromooctane (0.35 mL, 2.02 mmol), potassium carbonate (350 mg, 2.54 mmol) and DMF (3 mL) were used for the realkylation step.  $\text{C}_8\text{SS}$  (117 mg, 0.11 mmol, 42%) was obtained as a pale yellow solid. mp.  $92.5^\circ\text{C}$ ,  $^1\text{H}$  NMR (400 MHz;  $\text{CDCl}_3$ )  $\delta$  0.93 (t, 18H), 1.43 (br, 48H), 1.62 (quint,  $J = 7.2$  Hz, 12H), 1.93 (quint,  $J = 7.2$  Hz, 12H), 4.41 (t,  $J = 6.8$  Hz, 12H);  $^{13}\text{C}$  NMR (101 MHz;  $\text{CDCl}_3$ )  $\delta$  14.26 ( $\text{CH}_3$ ), 22.86 ( $\text{CH}_2$ ), 29.27 ( $\text{CH}_2$ ), 29.51 ( $\text{CH}_2$ ), 29.64 ( $\text{CH}_2$ ), 30.47 ( $\text{CH}_2$ ), 32.05 ( $\text{CH}_2$ ), 73.67 ( $\text{CH}_2$ ), 129.96 (C), 130.70 (C), 146.64 (C); MS (MALDI)  $m/z$  calcd for  $\text{C}_{66}\text{H}_{102}\text{O}_6\text{S}_3$  ( $\text{M}^+$ ) 1086.7, found: 1087.2; elemental analysis calcd for  $\text{C}_{66}\text{H}_{102}\text{O}_6\text{S}_3$ : C, 72.88; H, 9.45, found: C, 72.60; H, 9.70.

#### Synthesis of $\text{C}_{10}\text{SS}$

For the dealkylation,  $\text{C}_2\text{SS}$  (200 mg, 0.34 mmol) in dichloromethane (8 mL) was treated with boron tribromide in dichloromethane ( $1.0 \text{ mol L}^{-1}$ , 3.5 mL, 3.5 mmol). 1-Bromodecane (0.38 mL, 1.84 mmol), potassium carbonate (260 mg, 1.88 mmol) and DMF (5 mL) were used for the realkylation step.  $\text{C}_{10}\text{SS}$  (165 mg, 0.13 mmol, 39%) was obtained as an off-white solid. mp.  $83.0^\circ\text{C}$ ;  $^1\text{H}$  NMR

(500MHz; CDCl<sub>3</sub>)  $\delta$  0.89 (t,  $J$  = 7.2 Hz, 18H), 1.29–1.45 (m, 72H), 1.59 (quint,  $J$  = 7.2 Hz, 12H), 1.91 (quint,  $J$  = 7.2 Hz, 12H), 4.39 (t,  $J$  = 6.4 Hz, 12H); <sup>13</sup>C NMR (101 MHz; CDCl<sub>3</sub>)  $\delta$  14.26 (CH<sub>3</sub>), 22.86 (CH<sub>2</sub>), 26.28 (CH<sub>2</sub>), 29.55 (CH<sub>2</sub>), 29.69 (CH<sub>2</sub>), 29.82 (CH<sub>2</sub>), 29.87 (CH<sub>2</sub>), 30.48 (CH<sub>2</sub>), 32.11 (CH<sub>2</sub>), 73.64 (CH<sub>2</sub>), 129.99 (CH<sub>3</sub>), 130.72 (CH<sub>3</sub>), 146.66 (CH<sub>3</sub>); MS (MALDI)  $m/z$  calcd for C<sub>78</sub>H<sub>126</sub>O<sub>6</sub>S<sub>3</sub> (M<sup>+</sup>) 1254.9, found: 1255.5; elemental analysis calcd for C<sub>78</sub>H<sub>126</sub>O<sub>6</sub>S<sub>3</sub>: C, 74.59; H, 10.11, found: C, 74.46; H, 10.40.

### Synthesis of C16SS

For the dealkylation, C2SS (194 mg, 0.33 mmol) in dichloromethane (8 mL) was treated with boron tribromide in dichloromethane (1.0 mol L<sup>-1</sup>, 3.5 mL, 3.5 mmol). 1-Bromohexadecane (0.47 mL, 1.54 mmol), potassium carbonate (186 mg, 1.35 mmol) and DMF (5 mL) were used for the realkylation step. C16SS (73 mg, 0.04 mmol, 12%) was obtained as a white solid. mp. 70.0 °C; <sup>1</sup>H NMR (500MHz; CDCl<sub>3</sub>)  $\delta$  0.88 (t,  $J$  = 7.1 Hz, 18H), 1.26–1.45 (m, 144 H), 1.57 (quint,  $J$  = 7.6 Hz, 12H), 1.90 (quint,  $J$  = 7.6 Hz, 12H), 4.39 (t,  $J$  = 6.4 Hz, 12H); <sup>13</sup>C NMR (101 MHz; CDCl<sub>3</sub>)  $\delta$  14.26 (CH<sub>3</sub>), 22.68 (CH<sub>2</sub>), 22.86 (CH<sub>2</sub>), 23.02 (CH<sub>2</sub>), 26.27 (CH<sub>2</sub>), 26.42 (CH<sub>2</sub>), 29.54 (CH<sub>2</sub>), 29.68 (CH<sub>2</sub>), 29.87 (CH<sub>2</sub>), 29.91 (CH<sub>2</sub>), 30.46 (CH<sub>2</sub>), 31.93 (CH<sub>2</sub>), 32.10 (CH<sub>2</sub>), 32.27 (CH<sub>2</sub>), 73.67 (CH<sub>2</sub>), 130.14 (C), 130.85(C), 146.72 (C); MS (MALDI)  $m/z$  calcd for C<sub>114</sub>H<sub>198</sub>O<sub>6</sub>S<sub>3</sub> (M<sup>+</sup>) 1759.4, found: 1760.4; elemental analysis calcd for C<sub>114</sub>H<sub>198</sub>O<sub>6</sub>S<sub>3</sub>: C, 77.75; H, 11.33, found: C, 77.24; H, 11.40.

### 3. The optimized structures of triselenasumanene

The geometry optimization of triselenasumanene was performed using Gaussian 09 program<sup>1</sup> at the B3LYP/cc-pVDZ level of theory.

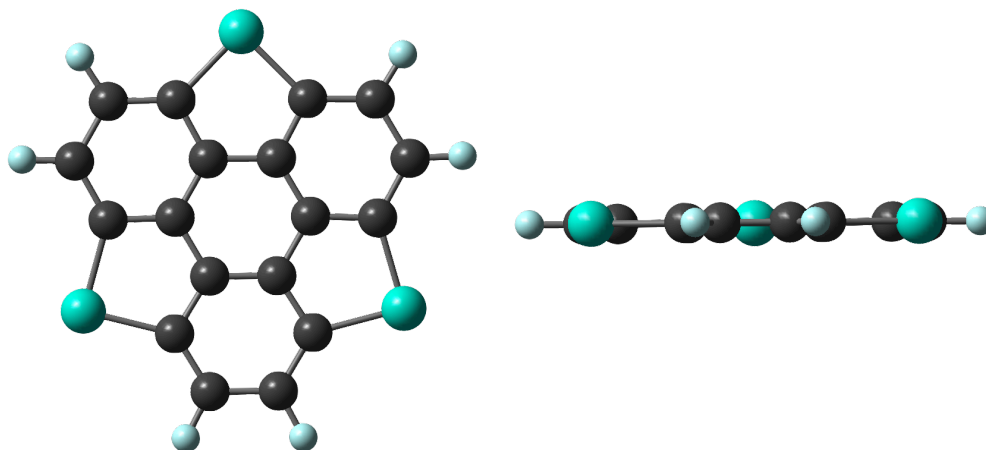

**Supplementary Figure 1.** The optimized structure of triselenasumanene: top view (left) and side view (right).

**Table S1.** Theoretically optimized coordinates of triselenasumanene (Cartesian coordinates in Å)

| atom | x         | y         | z | atom | x         | y         | z |
|------|-----------|-----------|---|------|-----------|-----------|---|
| C    | 0.710683  | 3.612464  | 0 | C    | 2.773144  | -2.421702 | 0 |
| C    | -0.710683 | 3.612464  | 0 | C    | 3.483828  | -1.190763 | 0 |
| C    | -1.435544 | 2.405058  | 0 | C    | 2.800613  | 0.040689  | 0 |
| C    | -0.697602 | 1.221221  | 0 | C    | 1.406409  | -0.00647  | 0 |
| C    | 0.697602  | 1.221221  | 0 | C    | 0.708808  | -1.214751 | 0 |
| C    | 1.435544  | 2.405058  | 0 | C    | 1.365069  | -2.445746 | 0 |
| Se   | 3.329432  | 1.922249  | 0 | Se   | 0         | -3.844497 | 0 |
| C    | -3.483828 | -1.190763 | 0 | H    | 3.353812  | -3.34616  | 0 |
| C    | -2.773144 | -2.421702 | 0 | H    | 4.574766  | -1.231406 | 0 |
| C    | -1.365069 | -2.445746 | 0 | H    | 1.220954  | 4.577566  | 0 |
| C    | -0.708808 | -1.214751 | 0 | H    | -1.220954 | 4.577566  | 0 |
| C    | -1.406409 | -0.00647  | 0 | H    | -4.574766 | -1.231406 | 0 |
| C    | -2.800613 | 0.040689  | 0 | H    | -3.353812 | -3.34616  | 0 |
| Se   | -3.329432 | 1.922249  | 0 |      |           |           |   |

### 3. PXRD analysis of C<sub>n</sub>SS derivatives

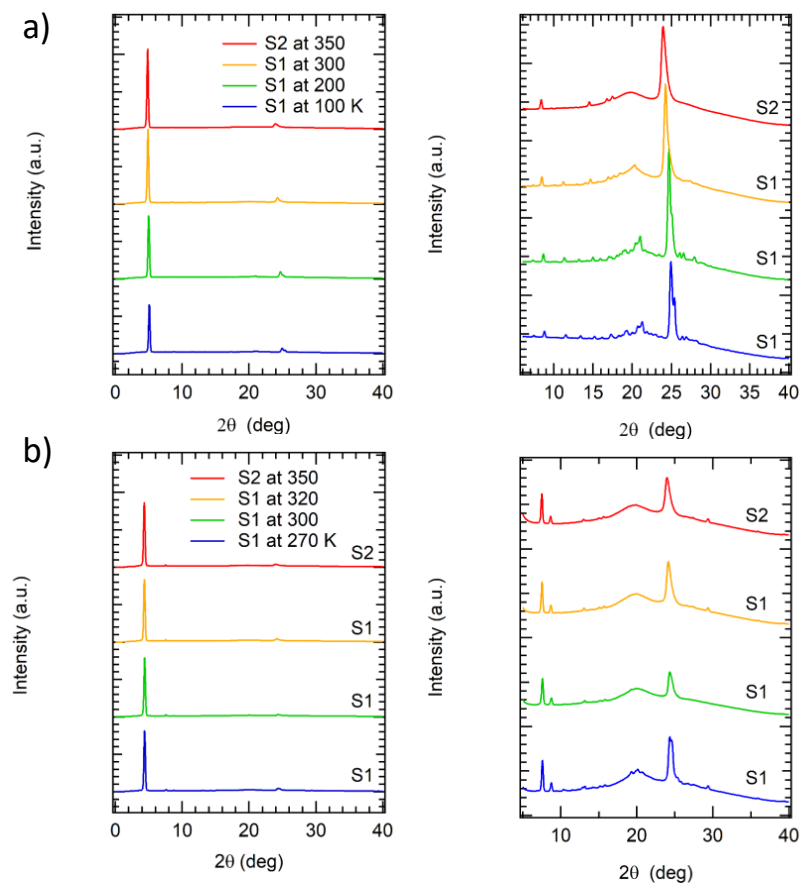

**Supplementary Figure 2.** Temperature-dependent PXRD patterns of a) C<sub>6</sub>SS and b) C<sub>8</sub>SS at S1 and S2 phases with the index assignments of 100, 110, 200, and 001 reflections. Right figure is expanded PXRD pattern at 2θ range from 5 to 40°.

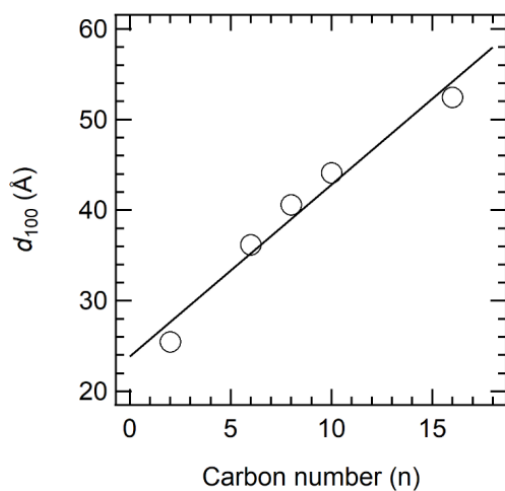

**Supplementary Figure 3.** A linear relationship of and the number of carbon atoms of alkyl chains ( $n = 2, 6, 8, 10$  and  $16$ ) and  $d_{100}$  spacing.

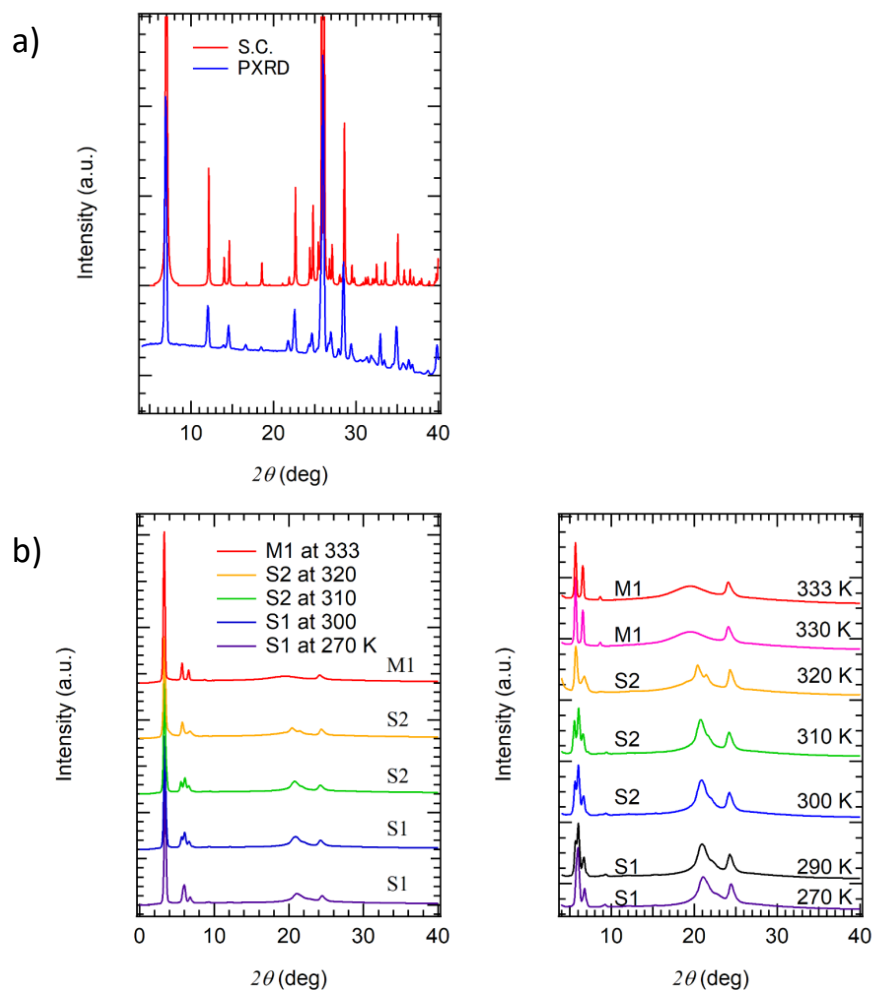

**Supplementary Figure 4.** Crystal structures of **C2SS** and **C16SS**. a) PXRD pattern (blue) and a simulated one (red) based on the single crystal X-ray crystal structural analysis of **C2SS**. b) Temperature dependent changes in the PXRD patterns at S1, S2 and M1 phases. Right figure shows the magnified diffraction patterns in the range of  $2\theta$  between  $5^\circ$  and  $40^\circ$ .



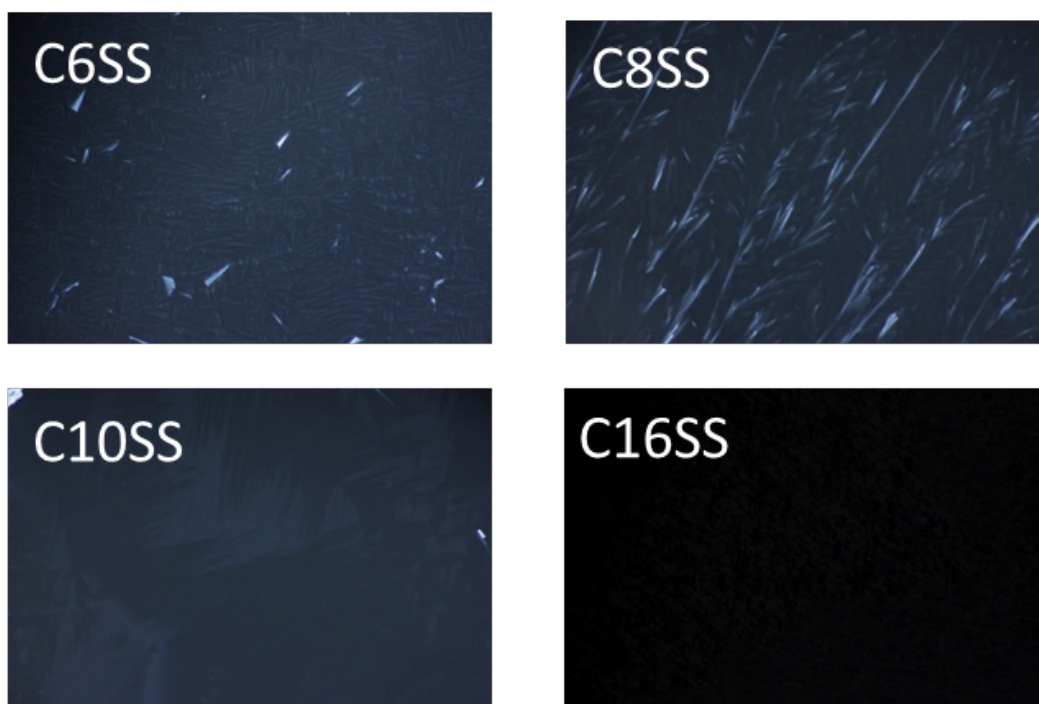

**Supplementary Figure 5.** POM images of S2 phase of C6SS, C8SS, C10SS, and C16SS. Dark images under the cross-Nicol optical arrangement were consistent with the homeotropic orientation of each column.

### SHG measurements of *CnSS*.

The intensity of the SHG activity was measured using the Kurtz powder method. Powder samples were sandwiched between glass plates, with a 58  $\mu\text{m}$  gap, and the temperature-dependent SHG signal was measured five times by comparison with sucrose. Temperature-dependent powder SHG measurement was conducted on glass substrate equipped with temperature controller and the SHG intensity was relative magnitude with sucrose. Although the SHG intensity was not strong due to insufficient polar domain orientation in the absence of the application of electric field and/or poling procedure, the SHG signal could be observed in the ferroelectric phase without the poling process through the phase transition from non-polar paraelectric to polar ferroelectric phase. A femtosecond pulsed beam (wavelength 1400 nm) from an optical parametric amplifier (Spectra-Physics, OPA-800C) pumped by a beam from a Ti:sapphire regenerative amplifier (Spectra-Physics, Spitfire) was used as the light source. The pulse duration was typically 150–200 fs, and the repetition rate was 1 kHz. The average incident power was 0.2 mW. The incident beam was focused by a plano-convex lens ( $f = 120$  mm). The output SHG signals at wavelength of 700 nm were detected by a photomultiplier tube (Hamamatsu, Model SR250) and processed using a boxcar average (Stanford Research, Model SR250).

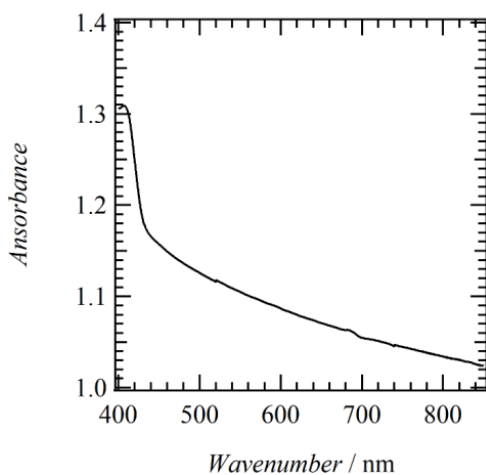

**Supplementary Figure 6.** Solid state diffuse scattering reflection spectra of C10SS at 298 K to examine the resonance energy region for SHG measurement.

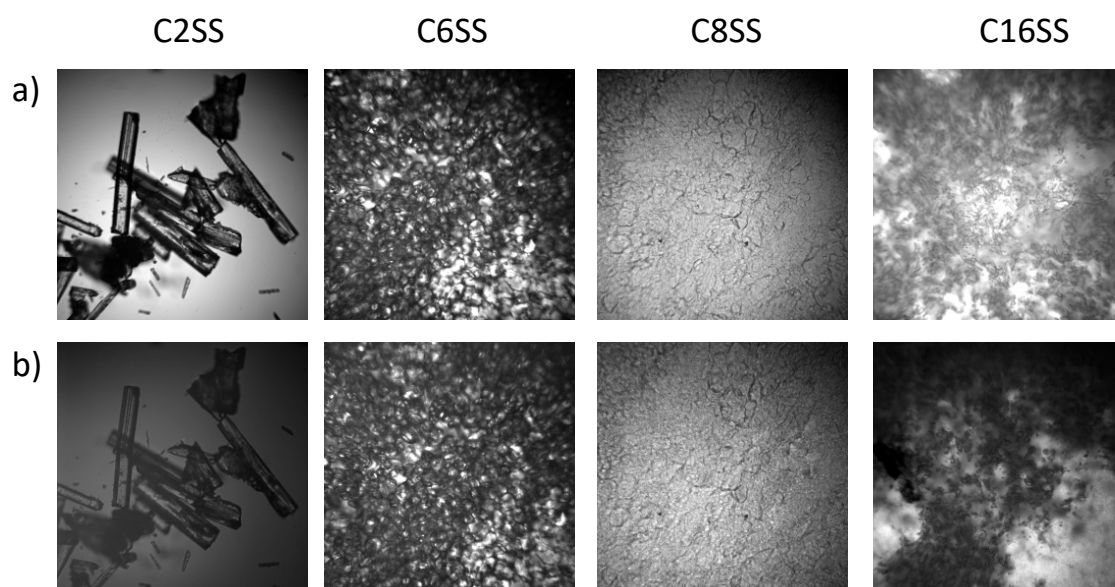

**Supplementary Figure 7.** POM images of  $C_nSS$  crystals a) with polarizer and b) without polarizer. The SHG activity was clearly observed at C2SS with an intensity of sucrose.

#### 4. Dielectric properties of CnSS derivatives

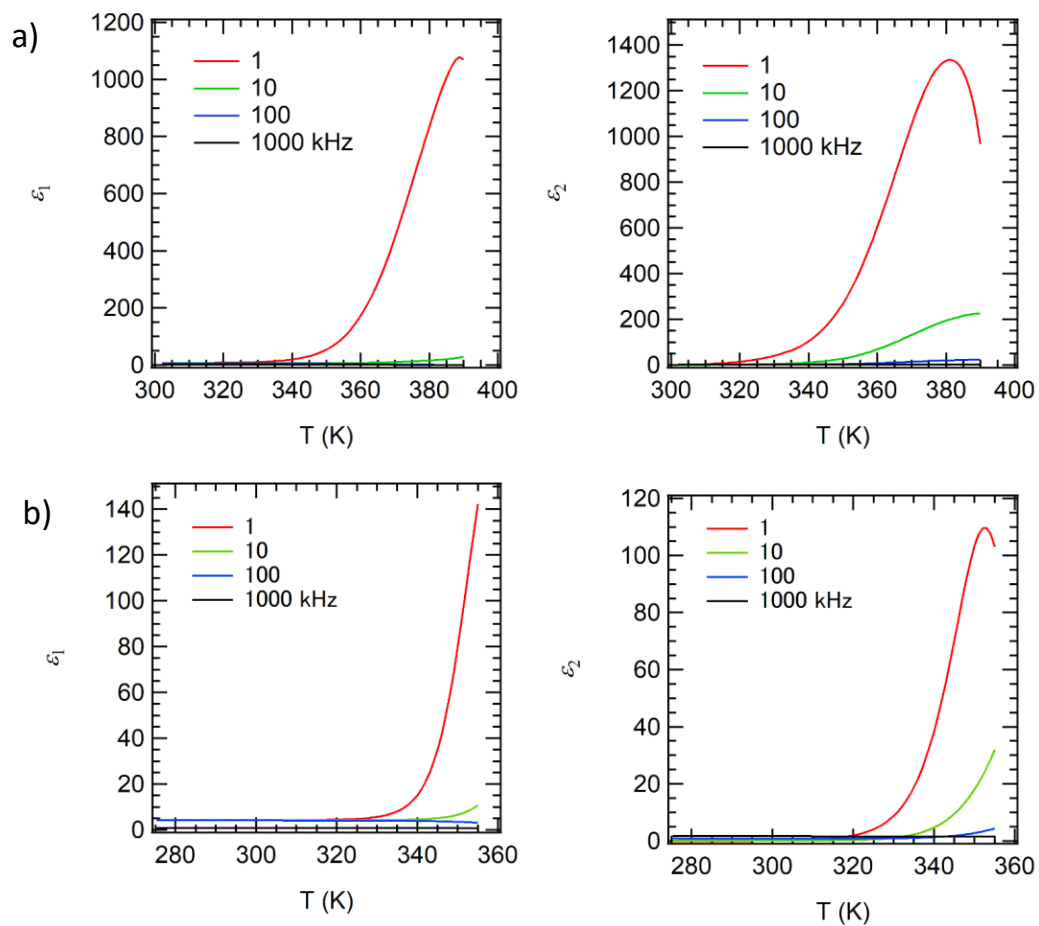

**Supplementary Figure 8.** Dielectric properties of a) C6SS and b) C8SS.  $T$ - and  $f$ -dependent real part  $\epsilon_1$  (left) and imaginary part  $\epsilon_2$  (right) dielectric constants in the heating process.

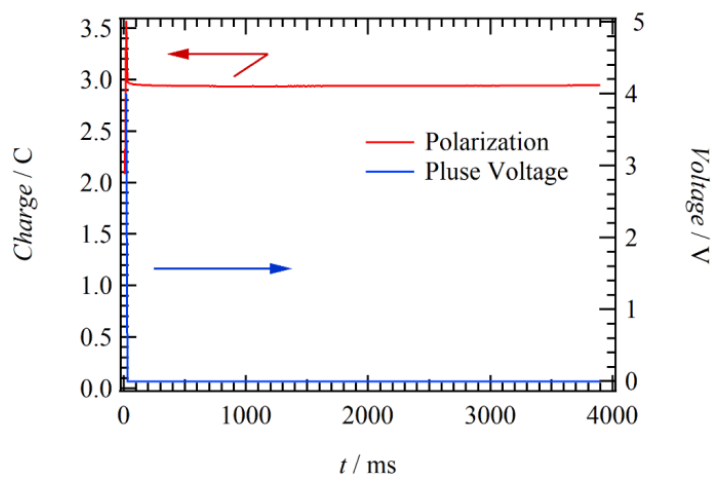

**Supplementary Figure 9.** Time-dependent polarization behavior of **C10SS** at 343K. The pulse voltage was applied at 4 V during 10 msec, then polarization change was monitored.

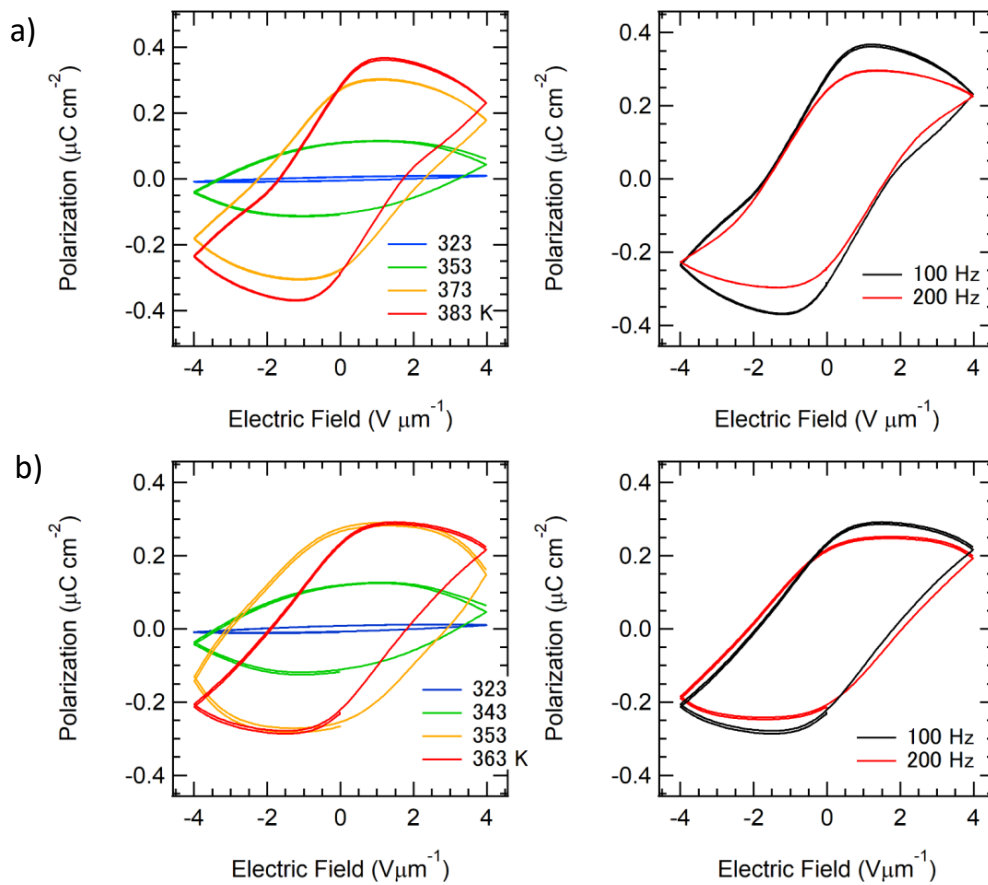

**Supplementary Figure 10.**  $T$ -dependent (left) and  $f$ -dependent (right)  $P$ - $E$  hysteresis curves of a) C6SS and b) C8SS. The  $T$ -dependent curves were obtained at  $f=100$  Hz. The  $f$ -dependent curves were obtained at 383 K for C6SS and 363 K for C8SS.

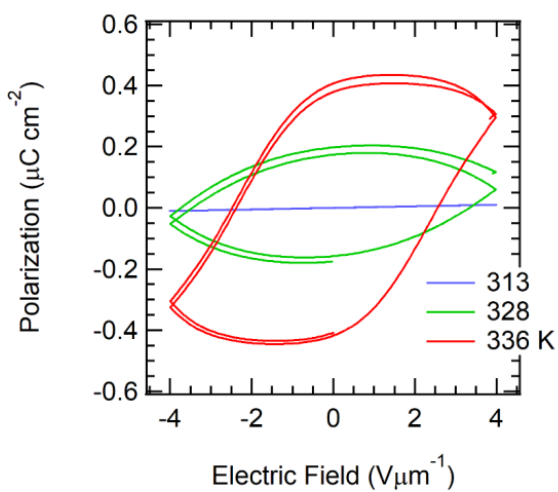

**Supplementary Figure 11.**  $T$ -dependent  $P$ - $E$  hysteresis curves at  $f=100$  Hz of C16SS.

## 5. Properties of the reference compounds, C<sub>4</sub>SeS and C<sub>6</sub>TP

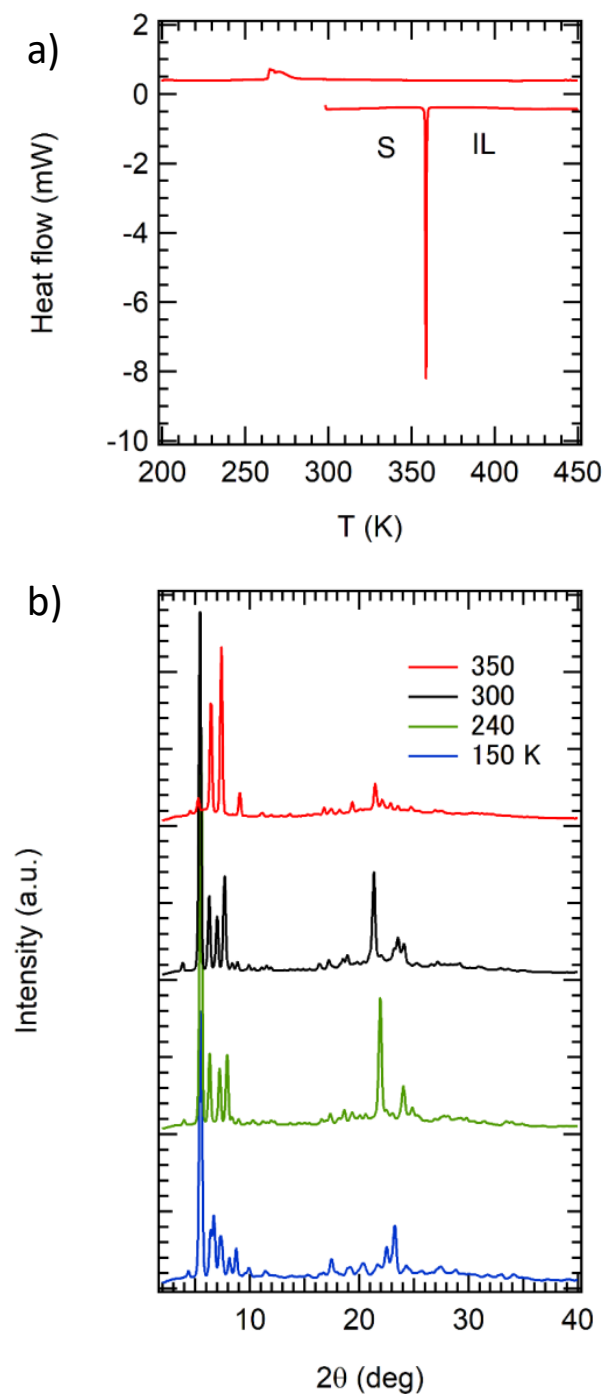

**Supplementary Figure 12.** Phase transition behavior and crystallinity of C<sub>4</sub>SeS. a) DSC chart in the first cycle and b) *T*-dependent PXRD pattern at *T* = 150, 240, 300, and 350 K.

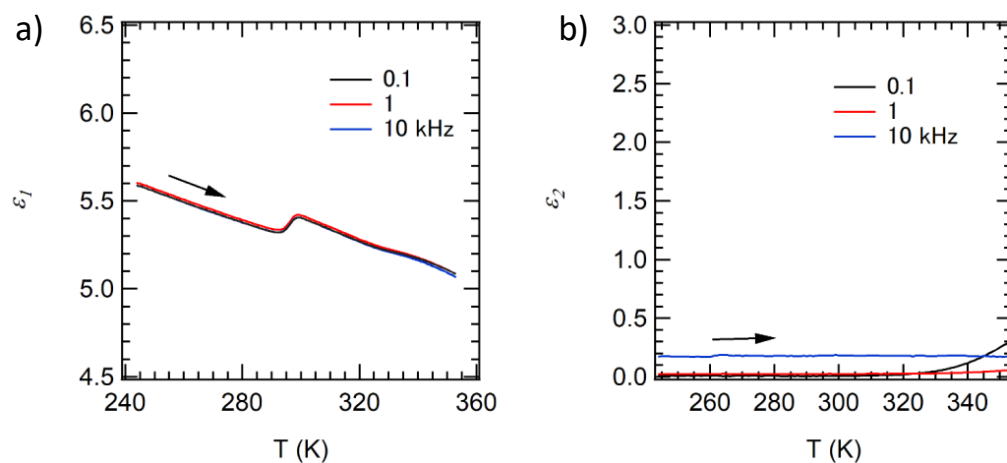

**Supplementary Figure 13.** Temperature and frequency dependent a) real part dielectric constant  $\epsilon_1$  and b) imaginary part dielectric constant  $\epsilon_2$  of **C4SeS** at  $f=0.1, 1,$  and  $10$  kHz.

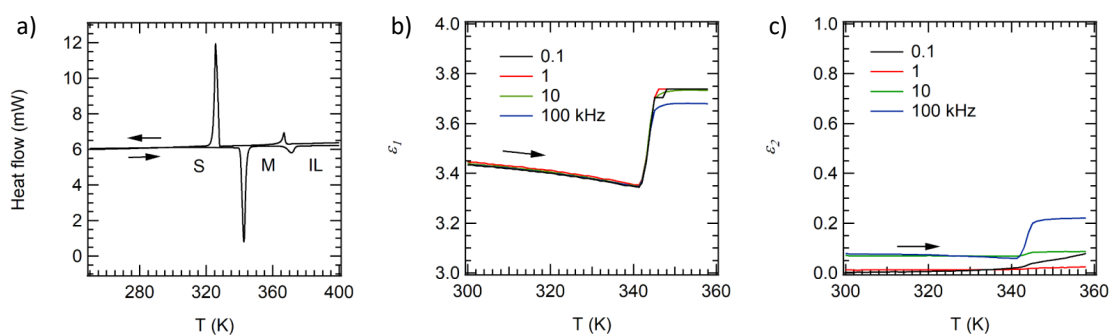

**Supplementary Figure 14.** Phase transition and dielectric behavior of **C6TP**. a) The S-M and M-IL phase transition in DSC chart.  $T$ - and  $f$ -dependent b) real part dielectric constant  $\epsilon_1$  and c) imaginary part dielectric constant  $\epsilon_2$  at  $f=0.1, 1, 10,$  and  $100$  kHz.



### Theoretical calculations of molecular dynamics.

Theoretical DFT calculation based on a basis function of B3LYP/6-31G(d) was utilized for each **C<sub>n</sub>SS** model calculations. Molecular structures was optimized by fixed angle at C-C-C-S (torsion angle), where the atomic coordinates of central benzene-ring were fixed at the result form the single crystal X-ray structural analysis and the torsion angle of six –OCH<sub>3</sub> groups to the benzene-ring was fixed at zero. The skew angel was obtained at **C1SS** dimer model with a fixed inter-dimer distance along the translational operation of the atomic coordinates, where the upper molecule was rotated and obtained the total energy. The energy minimum was defined as a zero for the relative energy scale at each figure.

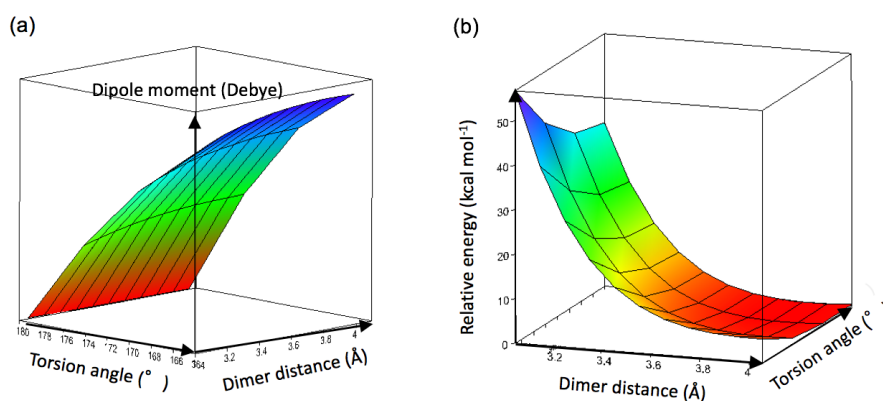

**Supplementary Figure 15.** 3D diagram of stable molecular arrangement. (a) Torsion angle (x) – Dimer distance (y) - dipole moment (z) plot and (b) dimer distance (x) – torsion angle (y) – relative energy (z) plot.

### Supplementary References

1. Gaussian 09, Revision B.01, M. J. Frisch, G. W. Trucks, H. B. Schlegel, G. E. Scuseria, M. A. Robb, J. R. Cheeseman, G. Scalmani, V. Barone, B. Mennucci, G. A. Petersson, H. Nakatsuji, M. Caricato, X. Li, H. P. Hratchian, A. F. Izmaylov, J. Bloino, G. Zheng, J. L. Sonnenberg, M. Hada, M. Ehara, K. Toyota, R. Fukuda, J. Hasegawa, M. Ishida, T. Nakajima, Y. Honda, O. Kitao, H. Nakai, T. Vreven, J. A. Montgomery, Jr., J. E. Peralta, F. Ogliaro, M. Bearpark, J. J. Heyd, E. Brothers, K. N. Kudin, V. N. Staroverov, T. Keith, R. Kobayashi, J. Normand, K. Raghavachari, A. Rendell, J. C. Burant, S. S. Iyengar, J. Tomasi, M. Cossi, N. Rega, J. M. Millam, M. Klene, J. E. Knox, J. B. Cross, V. Bakken, C. Adamo, J. Jaramillo, R. Gomperts, R. E. Stratmann, O. Yazyev, A. J. Austin, R. Cammi, C. Pomelli, J. W. Ochterski, R. L. Martin, K. Morokuma, V. G.

Zakrzewski, G. A. Voth, P. Salvador, J. J. Dannenberg, S. Dapprich, A. D. Daniels, O. Farkas, J. B. Foresman, J. V. Ortiz, J. Cioslowski, and D. J. Fox, Gaussian, Inc., Wallingford CT, 2010.

7. NMR charts

<sup>1</sup>H NMR spectrum of C2SS in CDCl<sub>3</sub>

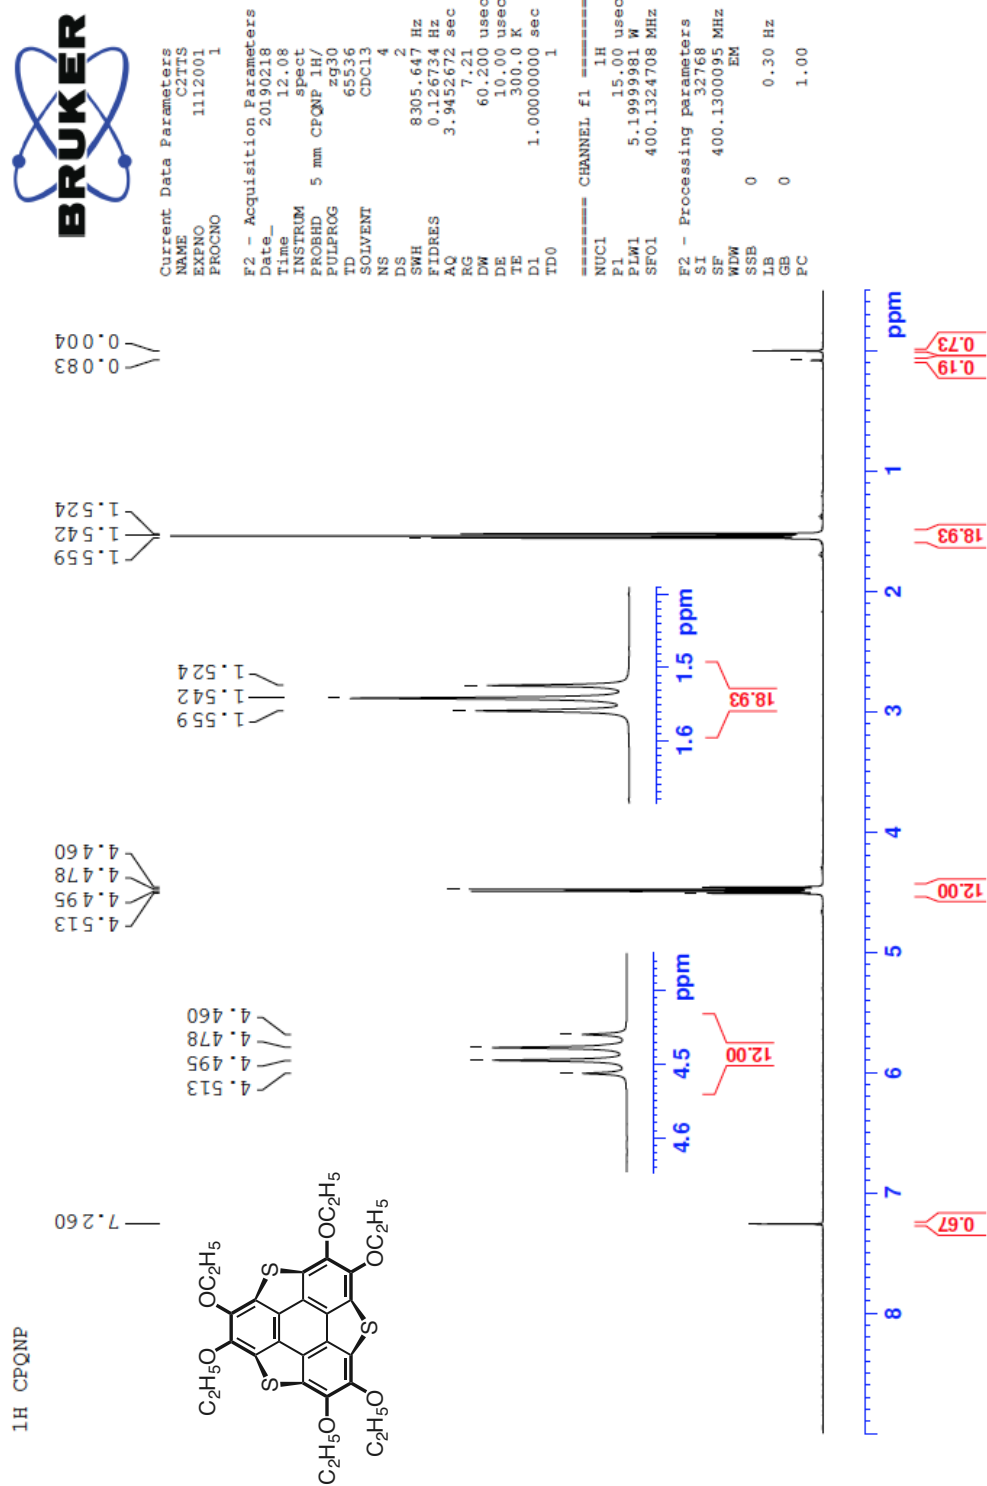

<sup>13</sup>C NMR spectrum of C2SS in CDCl<sub>3</sub>

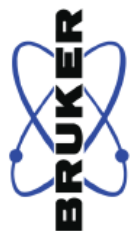

Current Data Parameters  
 NAME C2TIS  
 EXPNO 1112013  
 PROCNO 1

F2 - Acquisition Parameters  
 Date\_ 20190218  
 Time 12.18  
 INSTRUM spect  
 PROBHD 5 mm CPQNP 1H/  
 PULPROG zgpg30  
 TD 65536  
 SOLVENT CDCl<sub>3</sub>  
 NS 168  
 DS 2  
 SWH 29761.904 Hz  
 FIDRES 0.454131 Hz  
 AQ 1.1010048 sec  
 RG 126.99  
 DW 16.800 usec  
 DE 18.00 usec  
 TE 300.0 K  
 D1 2.00000000 sec  
 D11 0.03000000 sec  
 TDO 1

===== CHANNEL f1 =====  
 NUC1 <sup>13</sup>C  
 P1 12.00 usec  
 PLW1 15.50000000 W  
 SF01 100.6248425 MHz  
 ===== CHANNEL f2 =====  
 CPDPRG2 waltz16  
 NUC2 <sup>1</sup>H  
 PCPD2 90.00 usec  
 PLW2 5.19999981 W  
 PLW12 0.14444000 W  
 PLW13 0.11700000 W  
 SFO2 400.1316005 MHz

F2 - Processing parameters  
 SI 32768  
 SF 100.6127536 MHz  
 WDW EM  
 SSB 0  
 LB 0  
 GB 0  
 PC 1.40

<sup>13</sup>C with dec. CPQNP

146.54  
 131.13  
 130.31

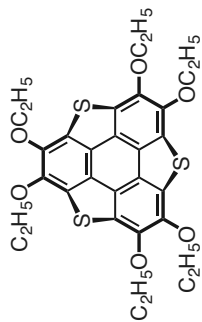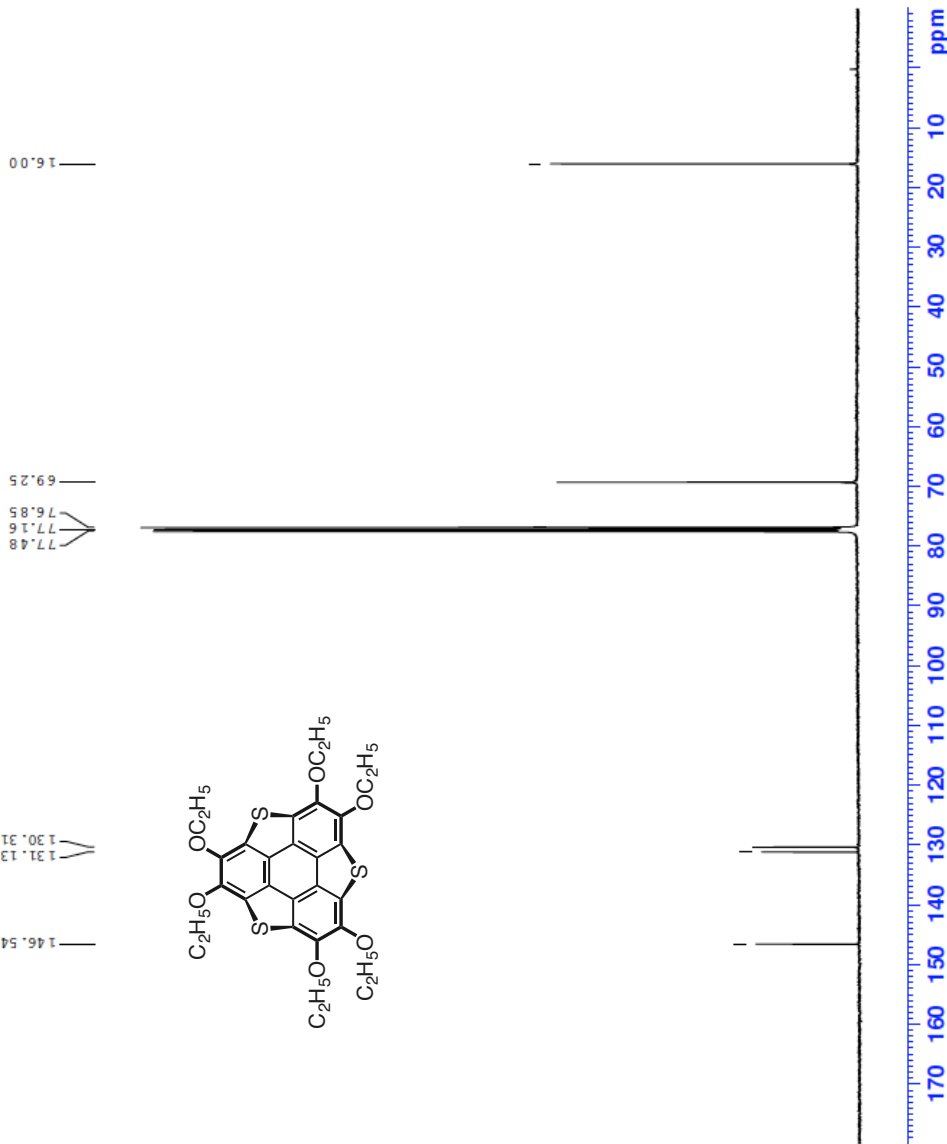

DEPT-135 of of C2SS in CDCl<sub>3</sub>

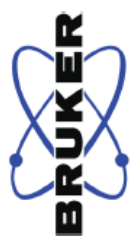

Current Data Parameters  
 NAME C2TS  
 EXPNO 1117135  
 PROCNO 1

F2 - Acquisition Parameters  
 Date\_ 20190318  
 Time\_ 16.43  
 INSTRUM spect  
 PROBRD 5 mm CPNP 1H/  
 PULPROG dect135  
 TD 65536  
 SOLVENT CDCl3  
 NS 70  
 DS 4  
 SWH 29761.904 Hz  
 FIDRES 0.054131 Hz  
 AQ 1.1100048 sec  
 RG 110.67  
 DW 15.800 usec  
 DE 38.00 usec  
 TE 300.0 K  
 RE 145.0000000  
 D1 2.0090000 sec  
 D2 0.00344828 sec  
 DL2 0.00002000 sec  
 TD0 1

===== CHANNEL f1 =====  
 NUC1 13C  
 P1 12.00 usec  
 F1 24.00 usec  
 PLW1 15.50000000 W  
 SFO1 100.6248425 MHz

===== CHANNEL f2 =====  
 CPDPRG2 waltz16  
 NUC2 1H  
 P3 15.00 usec  
 F3 30.00 usec  
 F4 30.00 usec  
 FCPD2 90.00 usec  
 FLW2 5.19999981 W  
 FLW12 0.1444000 W  
 SFO2 400.1316005 MHz

F2 - Processing parameters  
 SI 32768  
 SF 100.6127690 MHz  
 WDW EM  
 SSB 0  
 LB 0  
 GB 0  
 PC 1.00 Hz  
 1.40

13C DEPT135  
 CH, CH3 positive and CH2 negative

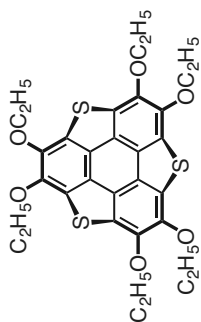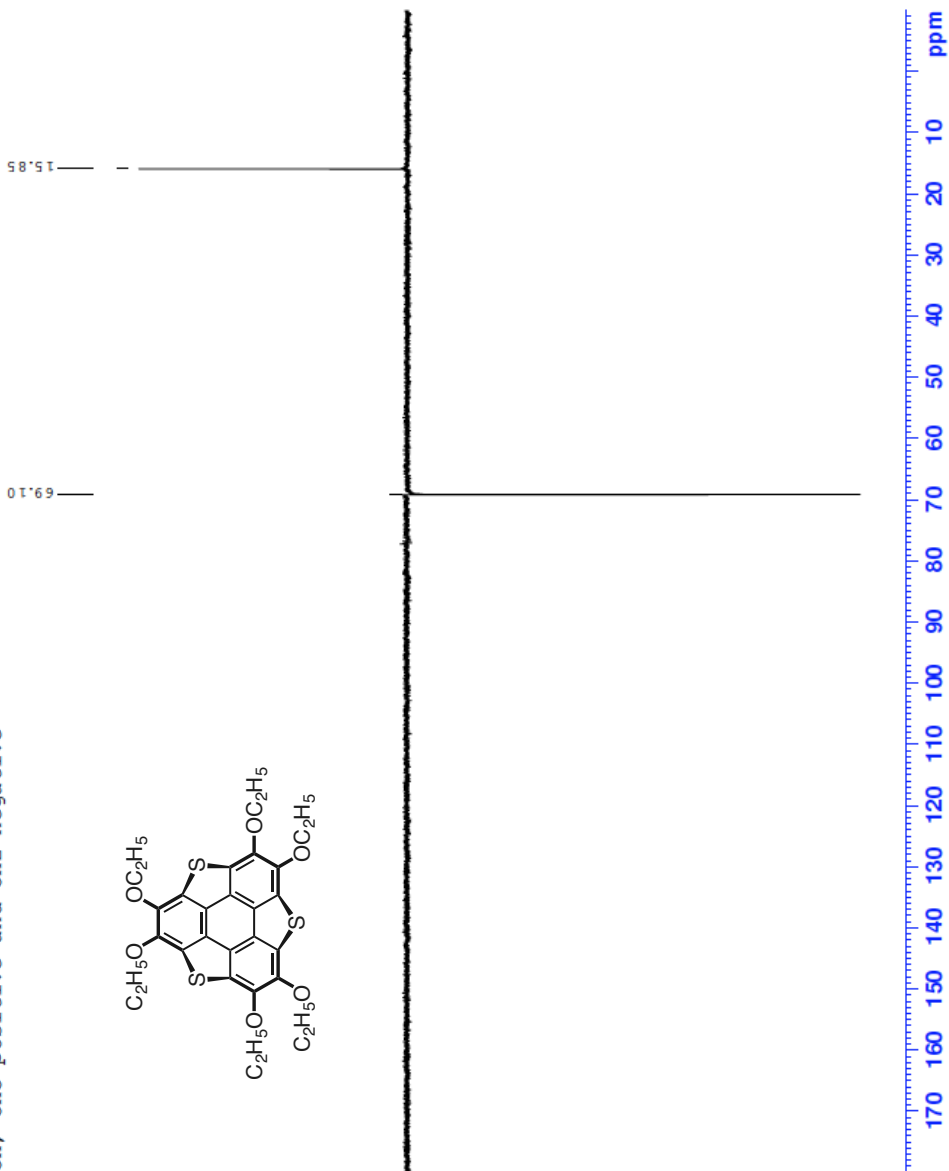

<sup>1</sup>H NMR spectrum of C6SS in CDCl<sub>3</sub>

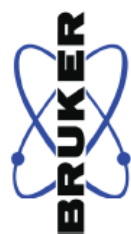

Current Data Parameters  
 NAME C6TIS  
 EXPNO 6000001  
 PROCNO 1  
 F2 - Acquisition Parameters  
 Date\_ 20180726  
 Time 12.35  
 INSTRUM spect  
 PROBHD 5 mm CPQNP 1H/  
 PULPROG zg30  
 TD 65536  
 SOLVENT CDCl3  
 NS 4  
 DS 2  
 SWH 8305.647 Hz  
 FIDRES 0.126734 Hz  
 AQ 3.9453672 sec  
 RG 7.721  
 DW 60.200 usec  
 DE 10.00 usec  
 TE 300.0 K  
 D1 1.00000000 sec  
 TD0 1  
 ===== CHANNEL f1 =====  
 NUC1 1H  
 P1 15.00 usec  
 PL1 5.19999981 W  
 SFO1 400.1324708 MHz  
 F2 - Processing parameters  
 SI 32768  
 SF 400.1300096 MHz  
 WDW EM  
 SSB 0  
 LB 0.30 Hz  
 GB 0  
 PC 1.00

<sup>1</sup>H CPQNP C6trithiasumanene in CDCl<sub>3</sub>

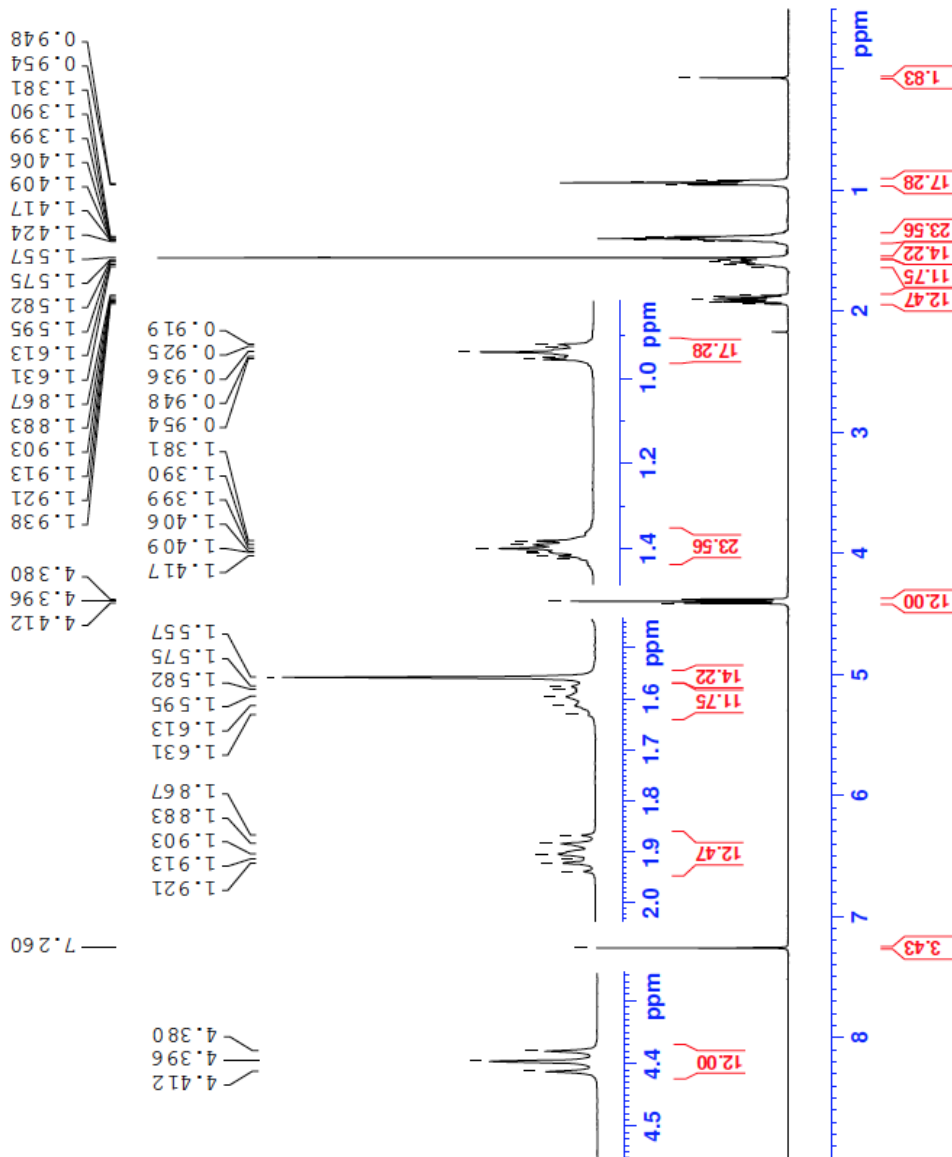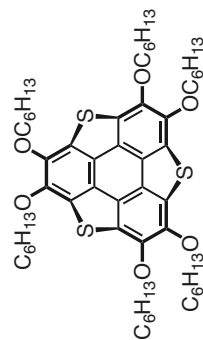

<sup>13</sup>C NMR spectrum of C6SS in CDCl<sub>3</sub>

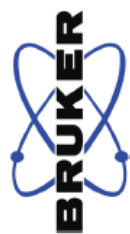

13C with dec. CPQNP

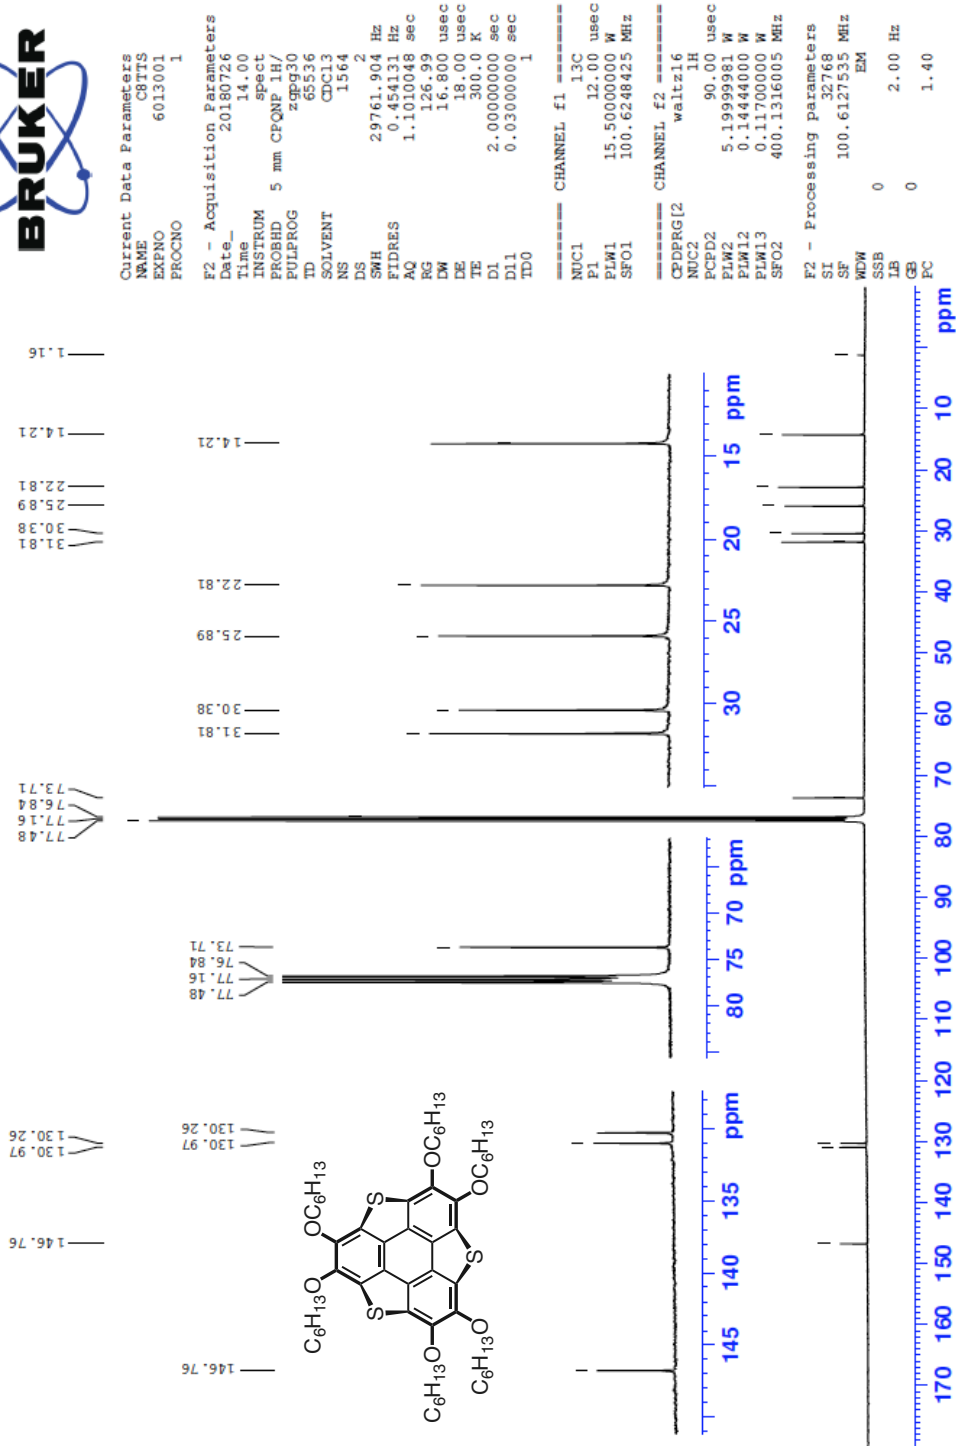

DEPT-135 of of C6SS in CDCl<sub>3</sub>

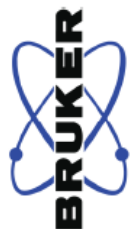

13C DEPT135  
CH, CH3 positive and CH2 negative

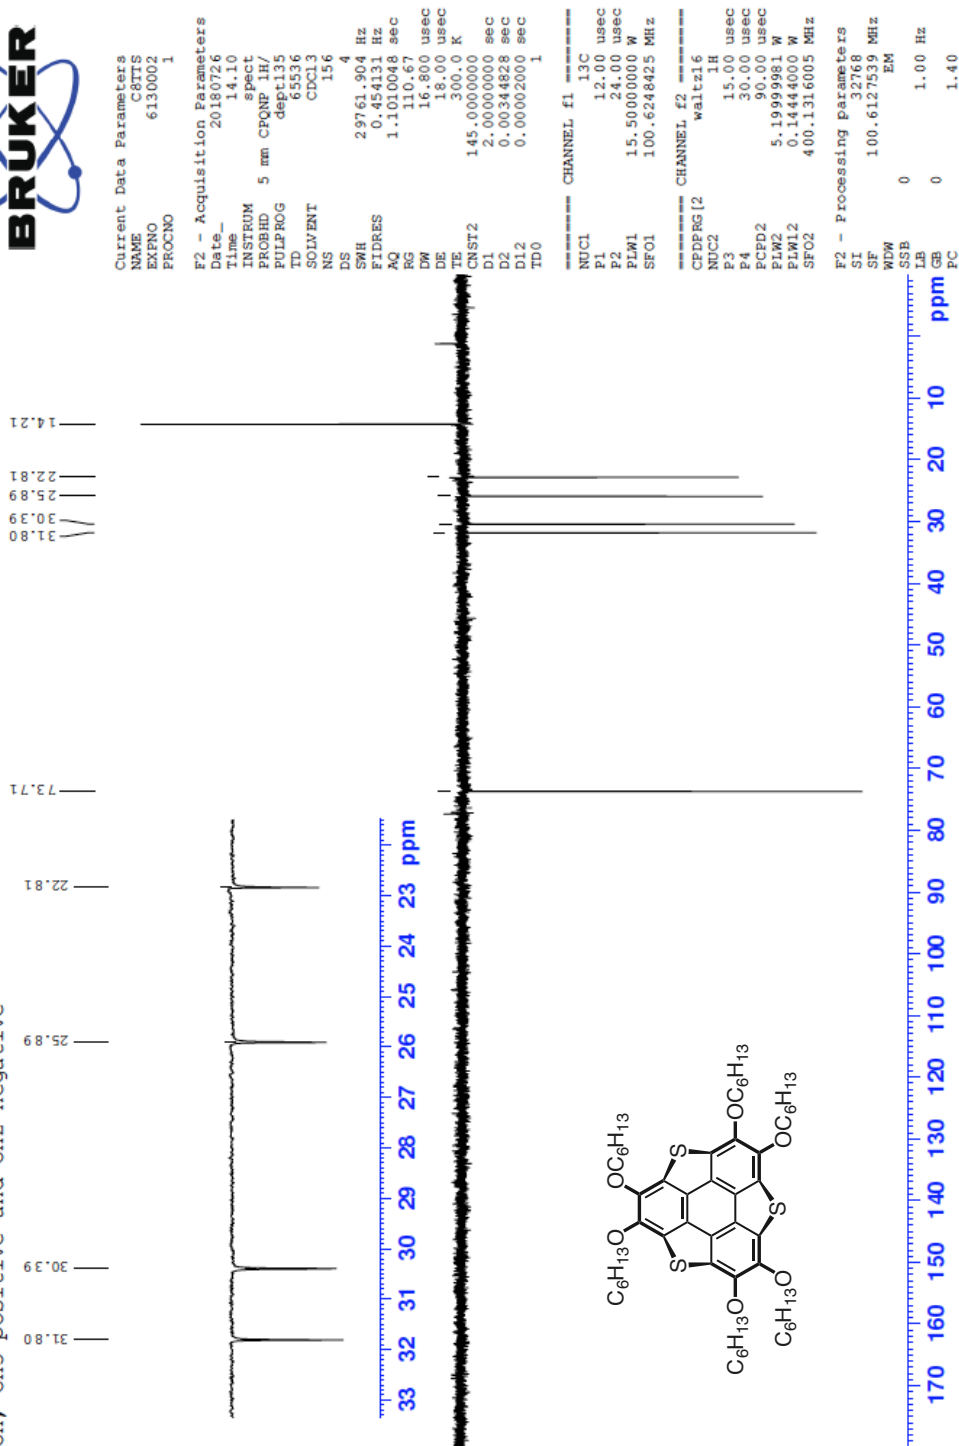



<sup>1</sup>H NMR spectrum of C8SS in CDCl<sub>3</sub>

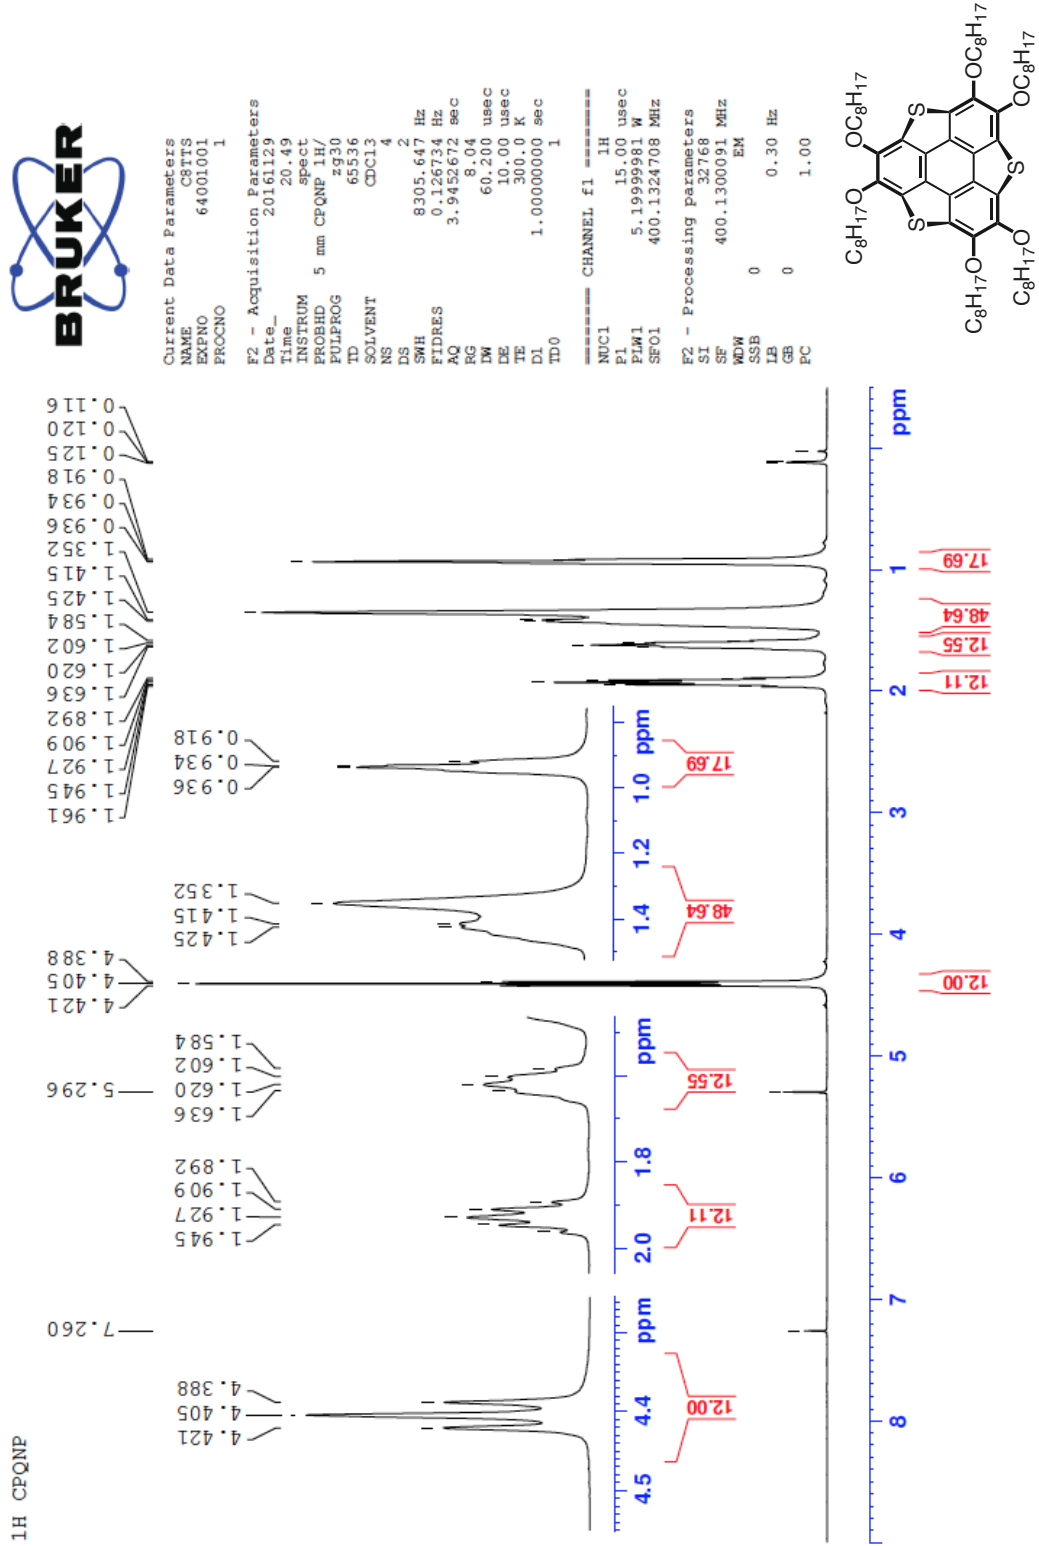

<sup>13</sup>C NMR spectrum of C8SS in CDCl<sub>3</sub>

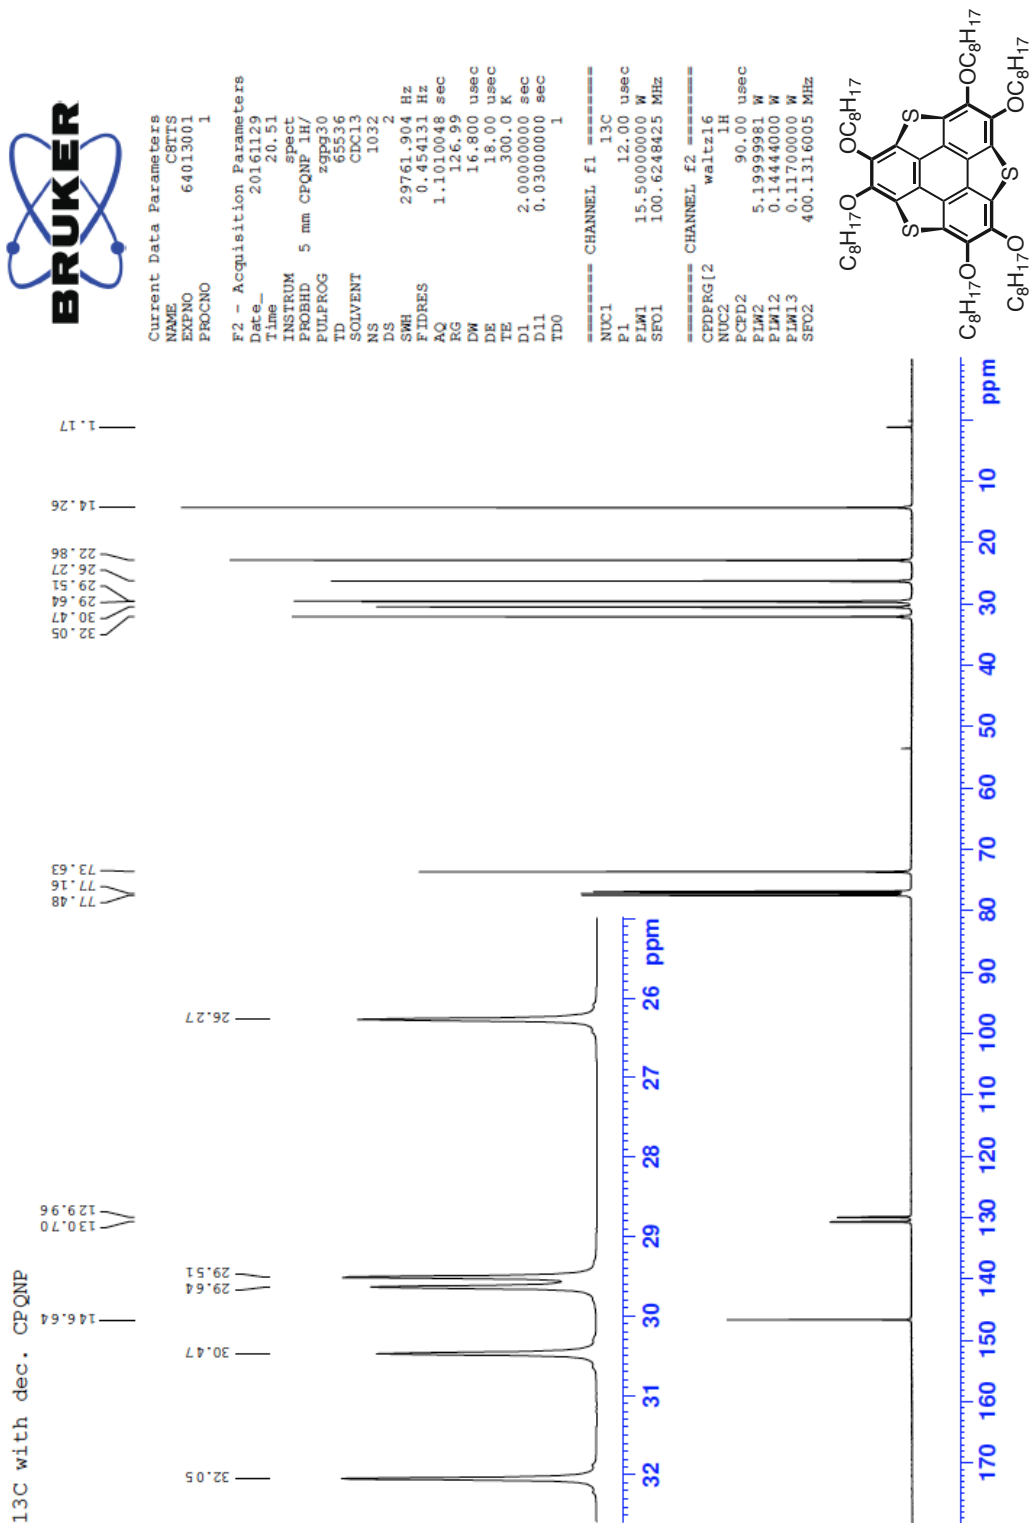

DEPT-135 of C8SS in CDCl<sub>3</sub>

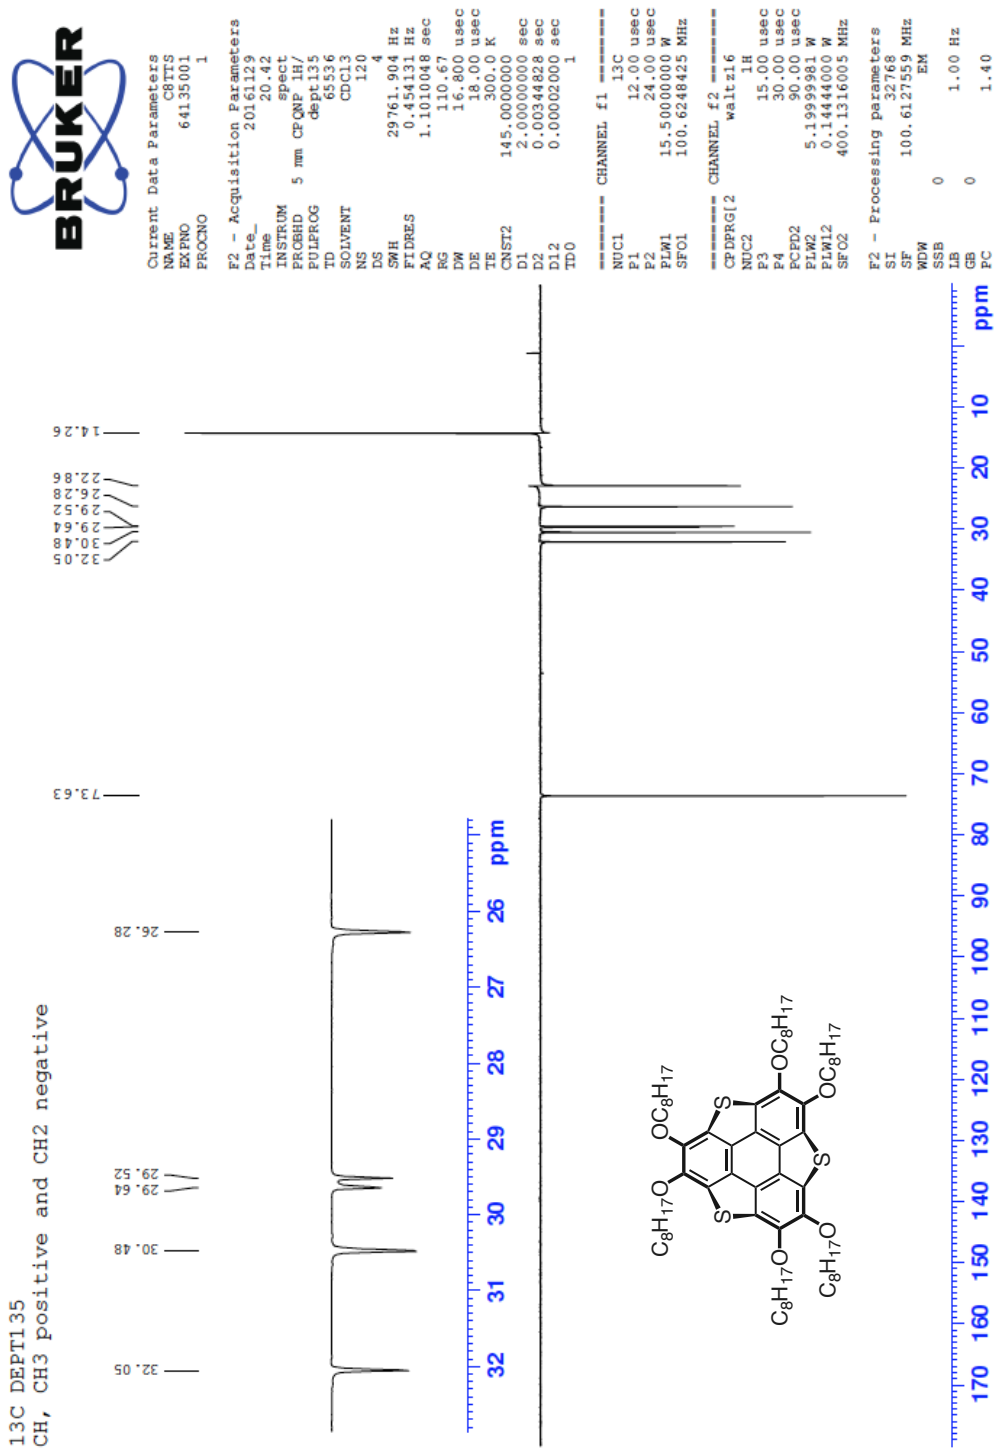

<sup>1</sup>H NMR spectrum of C10SS in CDCl<sub>3</sub>

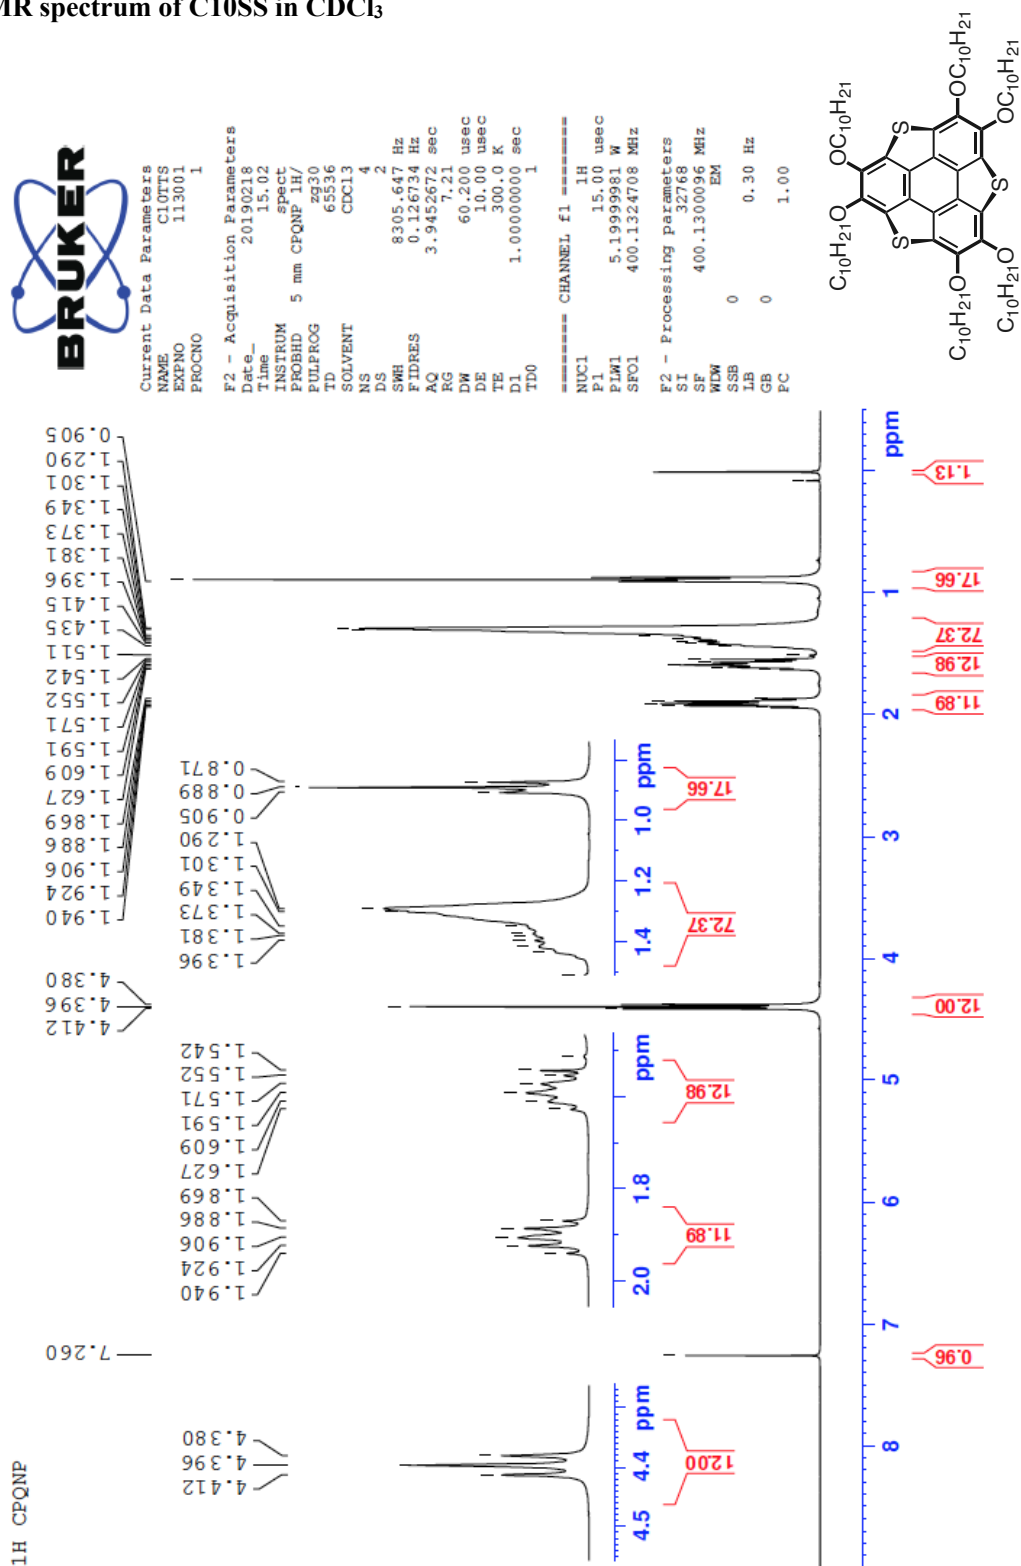

<sup>13</sup>C NMR spectrum of C10SS in CDCl<sub>3</sub>

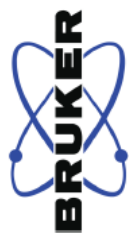

Current Data Parameters  
 NAME C10TTS  
 EXPNO 113013  
 PROCNO 1

F2 - Acquisition Parameters  
 Date\_ 20190218  
 Time 15.22  
 INSTRUM spect  
 PROBHD 5 mm CPQNP 1H/  
 PULPROG zgpg30  
 TD 65536  
 SOLVENT CDCl3  
 NS 362  
 DS 2  
 SWH 29761.904 Hz  
 FIDRES 0.454131 Hz  
 AQ 1.1010048 sec  
 RG 126.99  
 DW 16.800 usec  
 DE 18.00 usec  
 TE 300.0 K  
 D1 2.0000000 sec  
 D11 0.0300000 sec  
 ID0 1

===== CHANNEL f1 =====  
 NUC1 13C  
 P1 12.00 usec  
 PLW1 15.5000000 W  
 SFO1 100.6248425 MHz

===== CHANNEL f2 =====  
 CPDPRG[2] waltz16  
 NUC2 1H  
 P1 90.00 usec  
 PCPD2 5.19999981 W  
 PLW2 0.14444000 W  
 PLW13 0.11700000 W  
 SFO2 400.1316005 MHz

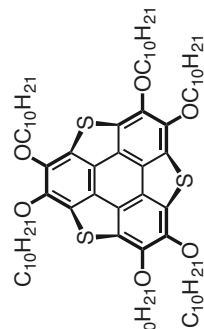

13C with dec. CPQNP

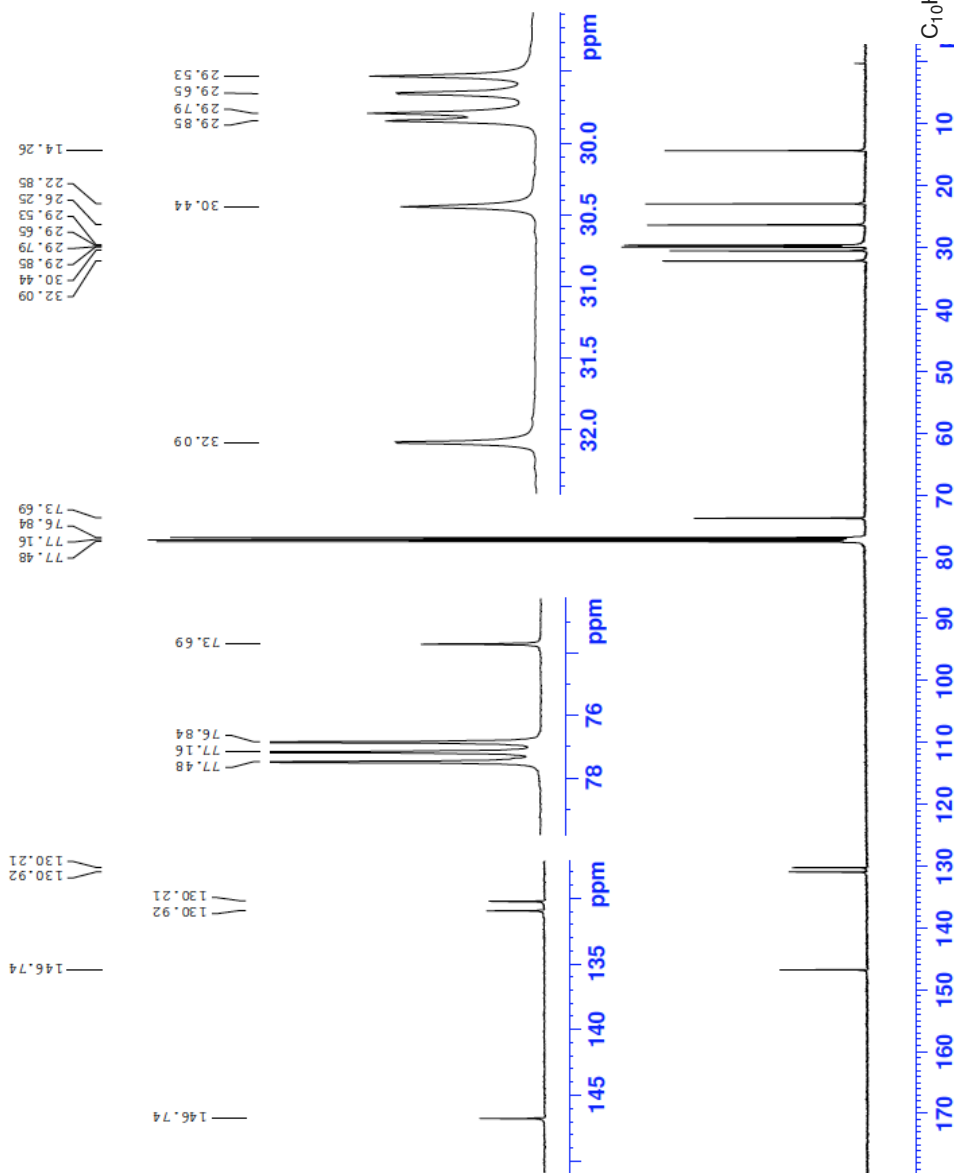

DEPT-135 of C10SS in CDCl<sub>3</sub>

<sup>1</sup>H NMR spectrum of C16SS in CDCl<sub>3</sub>

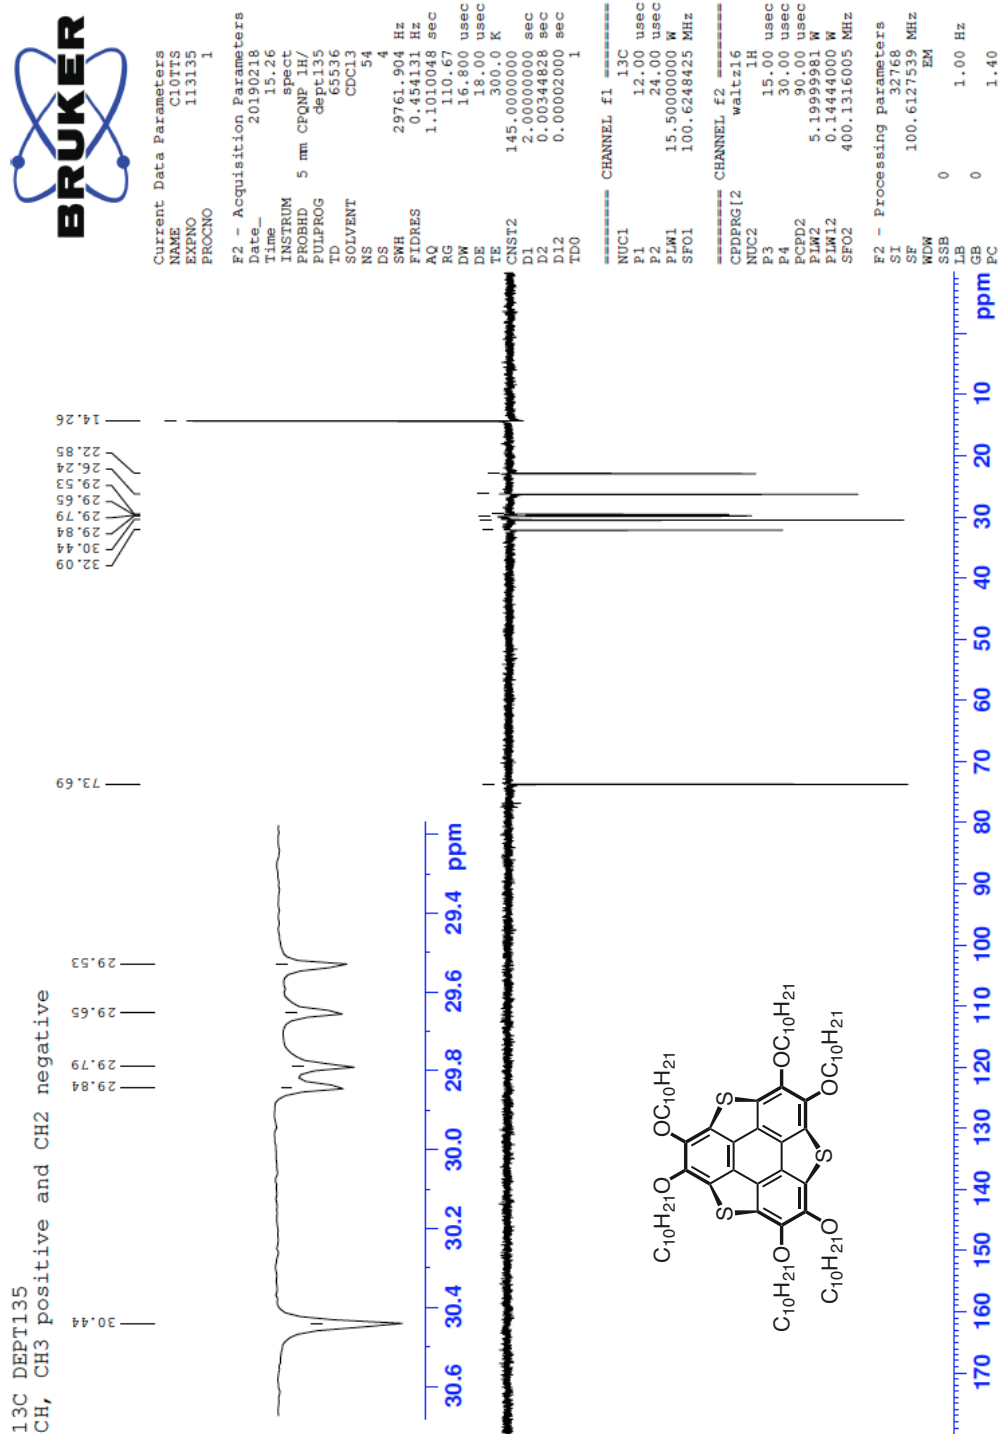

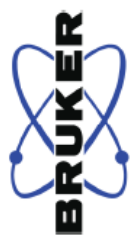

Current Data Parameters  
 NAME C16TTS  
 EXPNO 114001  
 PROCNO 1  
 F2 - Acquisition Parameters  
 Date\_ 20190218  
 Time\_ 15.31  
 INSTRUM spect  
 PROBDH 5 mm CPQNP 1H/  
 PULPROG zg30  
 TD 6536  
 SOLVENT CDCl3  
 NS 4  
 DS 2  
 SWH 8305.647 Hz  
 FIDRES 0.126734 Hz  
 AQ 3.9452672 sec  
 RG 7.21  
 DW 60.200 usec  
 DE 10.00 usec  
 TE 300.0 K  
 D1 1.00000000 sec  
 TD0 1  
 ===== CHANNEL f1 =====  
 NUC1 1H  
 P1 15.00 usec  
 PLW1 5.1999981 W  
 SF01 400.1324708 Mhz  
 F2 - Processing parameters  
 SI 32768  
 SF 400.1300095 Mhz  
 EM  
 WDW 0  
 SSB 0  
 LB 0.30 Hz  
 GB 0  
 PC 1.00

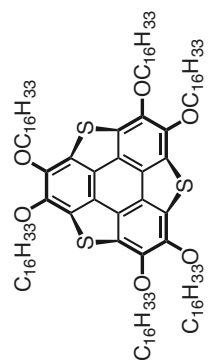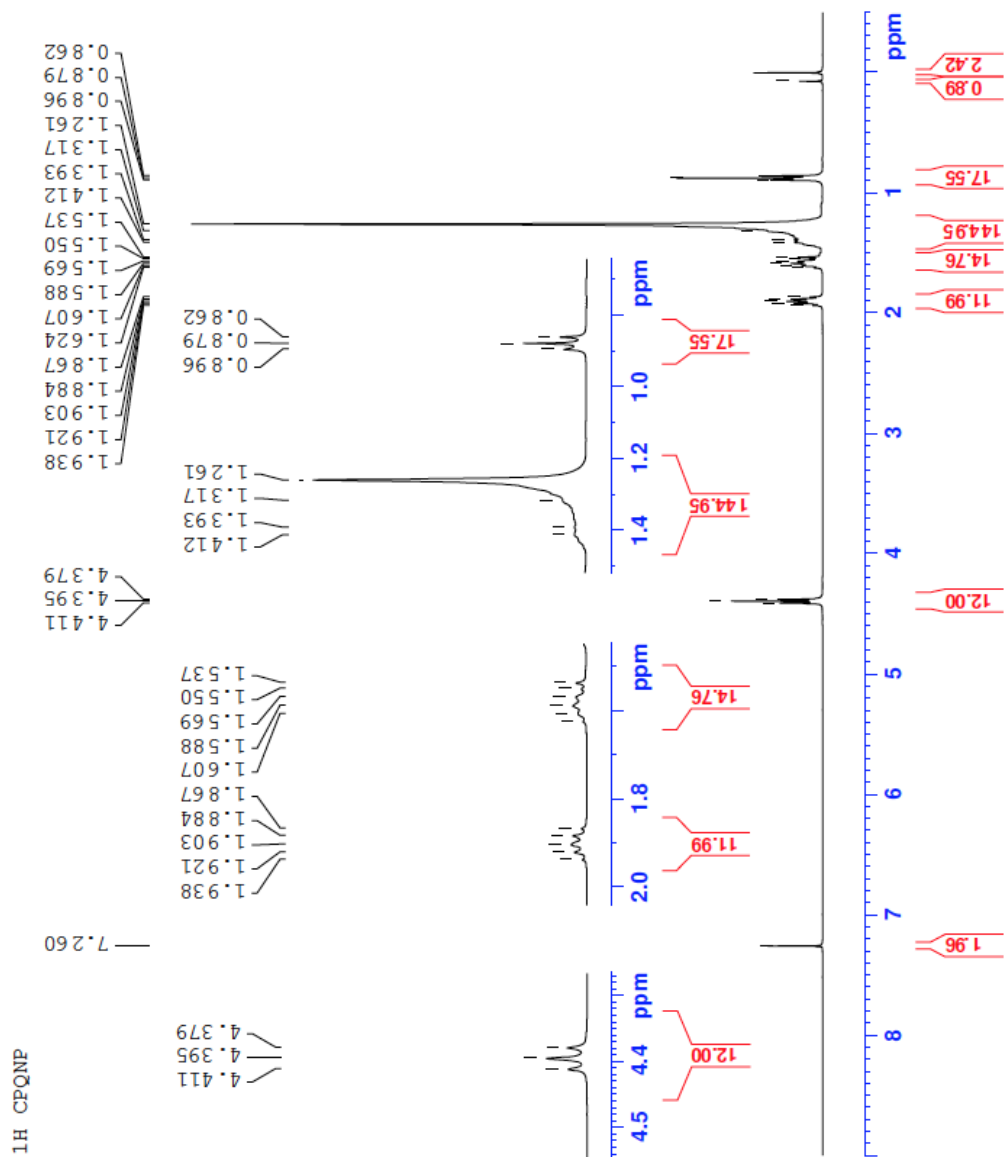

<sup>13</sup>C NMR spectrum of C16SS in CDCl<sub>3</sub>

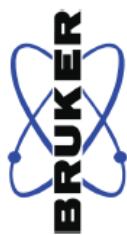

Current Data Parameters  
 NAME C16TTS  
 EXPNO 114013  
 PROCNO 1

F2 - Acquisition Parameters  
 Date\_ 20190218  
 Time 15.48  
 INSTRUM spect  
 PROBHD 5 mm CPQNP 1H/  
 PULPROG zgpg30  
 TD 65536  
 SOLVENT CDCl3  
 NS 274  
 DS 2  
 SWH 29761.904 Hz  
 FIDRES 0.454131 Hz  
 AQ 1.1010048 sec  
 RG 126.99  
 DW 16.800 usec  
 DE 18.00 usec  
 TE 300.0 K  
 D1 2.00000000 sec  
 D11 0.03000000 sec  
 TD0 1

===== CHANNEL f1 =====  
 NUC1 13C  
 P1 12.00 usec  
 PLW1 15.50000000 W  
 SFO1 100.6248425 MHz

===== CHANNEL f2 =====  
 CPDPRG[2] waltz16  
 NUC2 1H  
 PCD2 90.00 usec  
 PLW2 5.19999981 W  
 PLW12 0.14440000 W  
 PLW13 0.11700000 W  
 SFO2 400.1316005 MHz

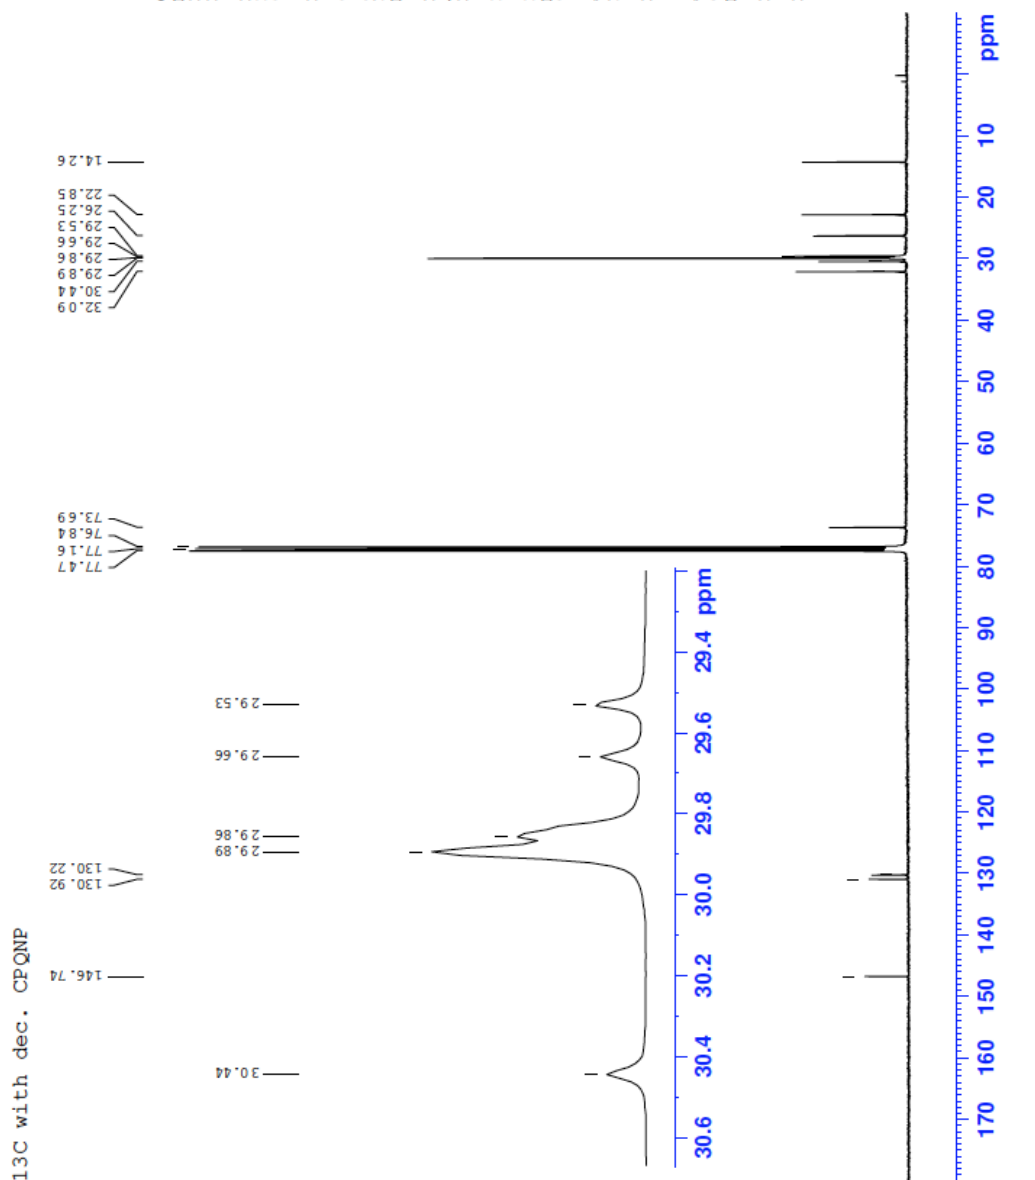

DEPT-135 of C16SS in CDCl<sub>3</sub>



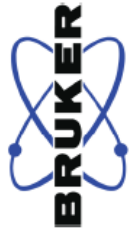

Current Data Parameters  
 NAME C16TTS  
 EXNO 114135  
 PROCNO 1

F2 - Acquisition Parameters  
 Date\_ 20190218  
 Time 15:56  
 INSTRUM spect  
 PROBRD 5 mm CPONE1H/7  
 PULPROG zgpg30  
 SOLVENT CDCl3  
 NS 128  
 DS 4  
 SWH 29761.904 Hz  
 FIDRES 0.454131 Hz  
 AQ 1.1010048 sec  
 RG 110.67  
 DW 16.800 usec  
 DE 18.00 usec  
 TE 300.0 K  
 CNST2 145.0000000 sec  
 D1 2.00000000 sec  
 D2 0.0034828 sec  
 D12 0.00002000 sec  
 TD0 1

CHANNEL f1  
 NUC1 13C  
 P1 12.00 usec  
 P2 24.00 usec  
 PLW1 15.50000000 W  
 SFO1 100.6248425 MHz

CHANNEL f2  
 CPDPRG2 waltz16  
 NUC2 1H  
 P3 15.00 usec  
 P4 30.00 usec  
 PCPD2 90.00 usec  
 PLW2 5.19999981 W  
 PLW12 0.14444000 W  
 SFO2 400.1316005 MHz

F2 - Processing Parameters  
 SI 32768  
 SF 100.6127544 MHz  
 EM  
 WDW 0  
 SSB 0  
 LB 1.00 Hz  
 GB 0  
 PC 1.40

13C DEPT135  
 CH, CH3 positive and CH2 negative

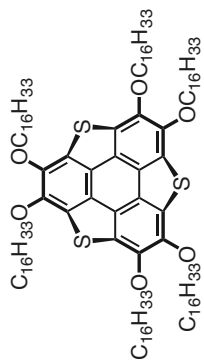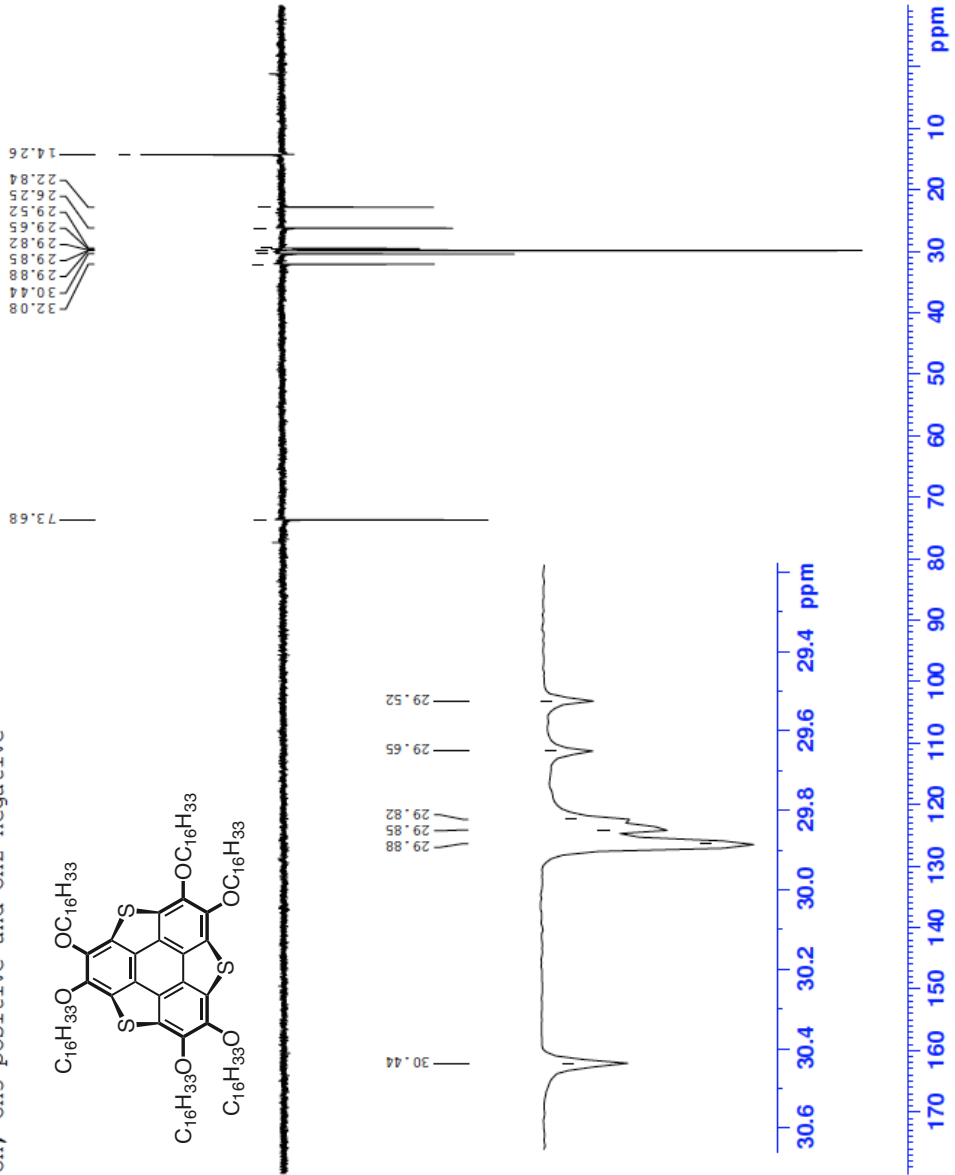

Supplement: 41467_2021_21019_MOESM1_ESM.pdf [file 41467_2021_21019_MOESM1_ESM.pdf]
